# Supplementary material for: Evaluation of Bioactive Effects of Five Plant Extracts with Different Phenolic Compositions against Different Therapeutic Targets
Source: MDPI journal article supplement (doi:10.3390/antiox13020217), 2024-02-08
Supplement: s1 [file s1]

# Supplementary Material

## Evaluation of bioactive effects of five plant extracts with different phenolic composition against different therapeutic targets

María del Carmen Villegas-Aguilar<sup>1</sup>, Noelia Sánchez-Marzo<sup>2</sup>, Álvaro Fernández-Ochoa<sup>1</sup>, Carmen Del Río<sup>3,4</sup>, Joan Montaner<sup>3,4</sup>, Vicente Micol<sup>2,5</sup>, María Herranz-López<sup>2</sup>, Enrique Barrajon-Catalán<sup>2</sup>, David Arráez-Román<sup>1</sup>, María de la Luz Cádiz-Gurrea<sup>1,\*</sup>, Antonio Segura-Carretero<sup>1</sup>

<sup>1</sup> Department of Analytical Chemistry, University of Granada, 18071 Granada, Spain

<sup>2</sup> Institute of Research, Development and Innovation in Biotechnology of Elche (IDiBE) and Molecular and Cell Biology Institute (IBMC), Miguel Hernández University (UMH), 03202 Elche, Spain

<sup>3</sup> Institute of Biomedicine of Seville (IBiS), Hospital Universitario Virgen del Rocío, CSIC, Universidad de Sevilla, 41013 Seville, Spain

<sup>4</sup> Department of Neurology, Hospital Universitario Virgen Macarena, 41009 Seville, Spain

<sup>5</sup> CIBEROBN (Physiopathology of Obesity and Nutrition CB12/03/30038) Carlos III Health Institute, 28029 Madrid, Spain

### Corresponding authors

\* mluzcadiz@ugr.es

**Figure S1.** Base peak chromatogram from the extracts. A. *T. cacao*. B. *H. sabdariffa*. C. *S. marianum*. D. *L. citriodora*. E. *O. europaea*.

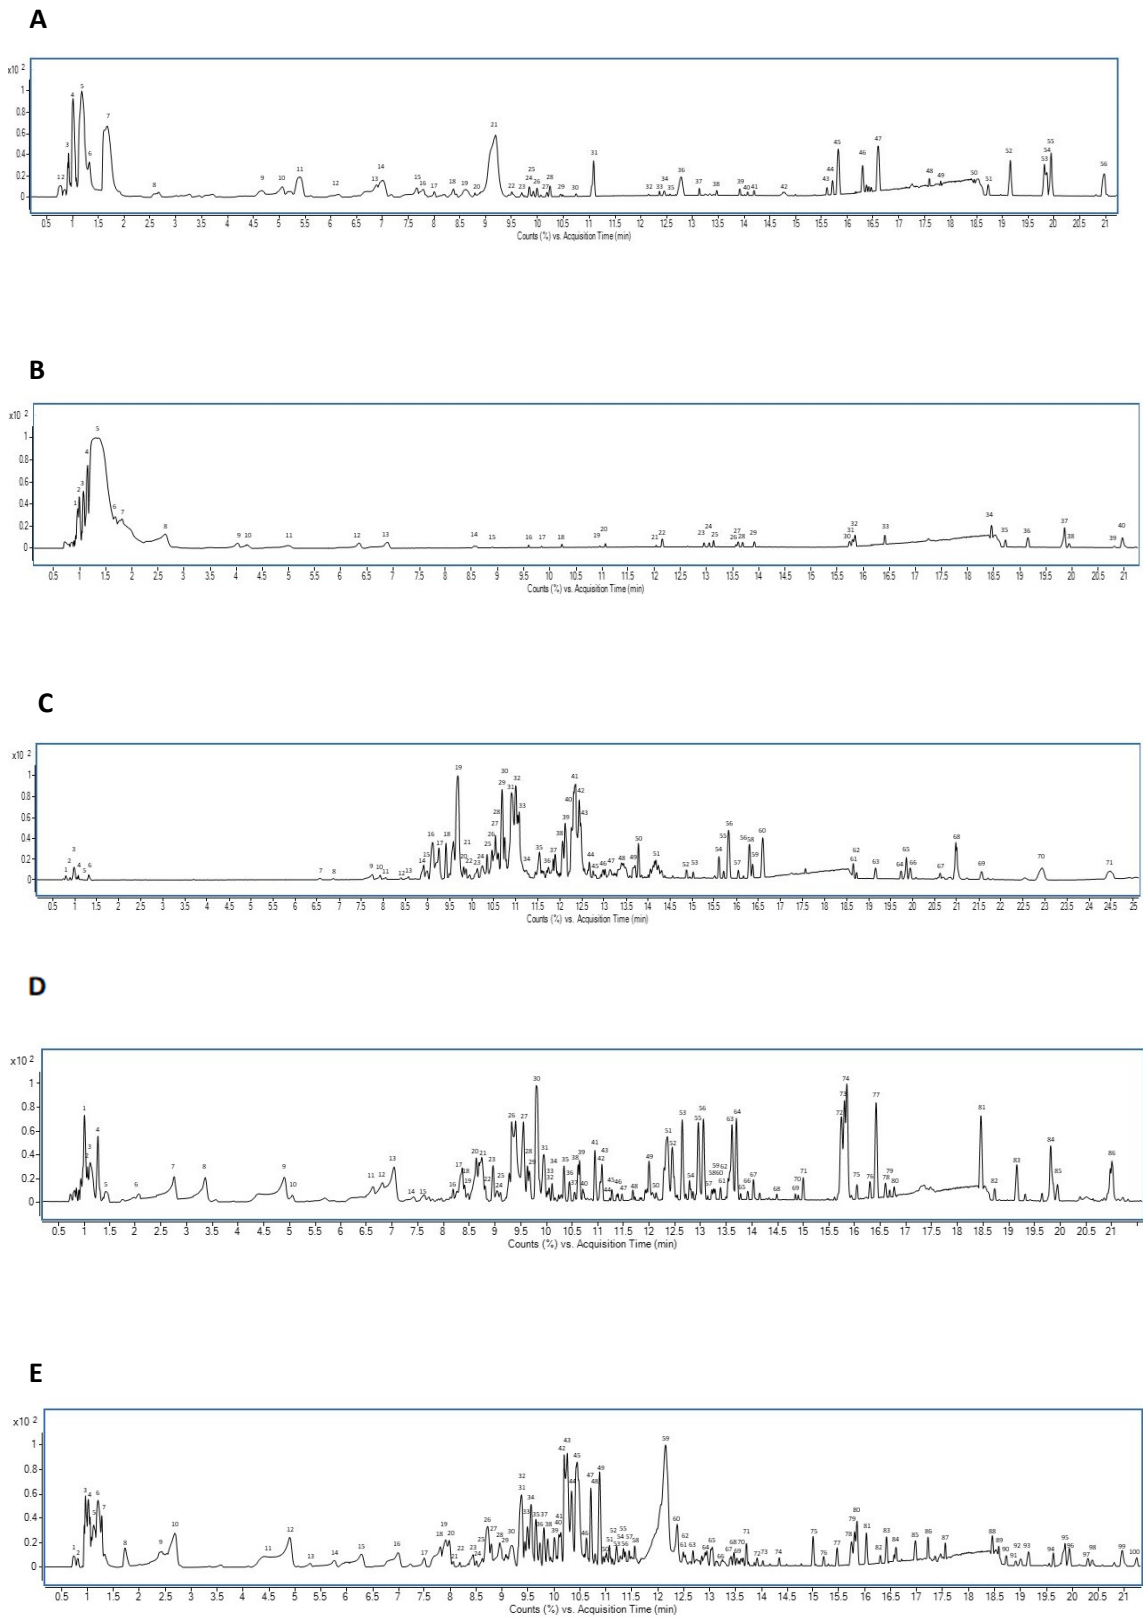

**Table S1.** Identification of phytochemical compounds in *T. cacao* extract by HPLC-ESI-qTOF-MS.

| Peak | RT (min) | Observed [M-H]- | Theoretical [M-H]- | Mass error (ppm) | Mol. Formula                                                 | Level of annotation | Compounds                                                 | MS/MS fragments | References                              |
|------|----------|-----------------|--------------------|------------------|--------------------------------------------------------------|---------------------|-----------------------------------------------------------|-----------------|-----------------------------------------|
| 1    | 0.75     | 272.9512        | -                  | -                | -                                                            | 4                   | Unknown                                                   | -               | -                                       |
| 2    | 0.91     | 203.1035        | 203.1037           | -0.98            | C <sub>8</sub> H <sub>16</sub> N <sub>2</sub> O <sub>4</sub> | 2                   | Valylserine                                               | 74/141/173      | Pubchem: 18218236                       |
| 3    | 0.92     | 217.1187        | 217.1194           | -3.22            | C <sub>9</sub> H <sub>18</sub> N <sub>2</sub> O <sub>4</sub> | 2                   | Leucylserine                                              | 74/129/173      | Pubchem: 3621685                        |
| 4    | 1.01     | 195.0519        | 195.0510           | 4.61             | C <sub>6</sub> H <sub>12</sub> O <sub>7</sub>                | 2                   | Gluconic acid                                             | 75/129/177      | HMDB0000625                             |
| 5    | 1.13     | 191.0207        | 191.0197           | 5.24             | C <sub>6</sub> H <sub>8</sub> O <sub>7</sub>                 | 2                   | Citric acid isomer 1                                      | 87/111          | HMDB0000094                             |
| 6    | 1.33     | 191.0228        | 191.0197           | 16.23            | C <sub>6</sub> H <sub>8</sub> O <sub>7</sub>                 | 2                   | Citric acid isomer 2                                      | 87/111          | HMDB0000094                             |
| 7    | 1.69     | 96.9605         | 96.9601            | 4.13             | H <sub>2</sub> O <sub>4</sub> S                              | 3                   | Sulfate                                                   | -               | HMDB0001448                             |
| 8    | 2.67     | 117.0554        | 117.0557           | -2.56            | C <sub>5</sub> H <sub>10</sub> O <sub>3</sub>                | 2                   | 3-Hydroxyvaleric acid                                     | 71/99           | HMDB0000531                             |
| 9    | 4.66     | 294.0606        | 294.0619           | -4.42            | C <sub>13</sub> H <sub>13</sub> NO <sub>7</sub>              | 2                   | N-caffeoyl-L-aspartate isomer 1                           | 88/132/179      | (M. L. Cádiz-Gurrea et al., 2014)       |
| 10   | 5.05     | 294.0610        | 294.0619           | -3.06            | C <sub>13</sub> H <sub>13</sub> NO <sub>7</sub>              | 2                   | N-caffeoyl-L-aspartate isomer 2                           | 88/132/179      | (M. L. Cádiz-Gurrea et al., 2014)       |
| 11   | 5.40     | 131.0704        | 131.0714           | -7.63            | C <sub>6</sub> H <sub>12</sub> O <sub>3</sub>                | 2                   | L-Leucate                                                 | 85              | Pubchem: 69955                          |
| 12   | 5.61     | 407.1554        | 407.1559           | -1.23            | C <sub>17</sub> H <sub>28</sub> O <sub>11</sub>              | 3                   | Secoiridoid derived                                       | 99/263/305      | (M. de la L. Cádiz-Gurrea et al., 2020) |
| 13   | 6.88     | 278.0670        | 278.0670           | 0.00             | C <sub>13</sub> H <sub>13</sub> NO <sub>6</sub>              | 2                   | L-Aspartic acid. N-[3-(4-hydroxyphenyl)-1-oxo-2-propenyl] | 71/93/119       | (M. L. Cádiz-Gurrea et al., 2014)       |
| 14   | 7.01     | 165.0554        | 165.0557           | -1.82            | C <sub>9</sub> H <sub>10</sub> O <sub>3</sub>                | 2                   | Dihydro-p-coumaric acid                                   | 72/103/147      | HMDB0002199                             |
| 15   | 7.60     | 289.0716        | 289.0718           | -0.69            | C <sub>15</sub> H <sub>14</sub> O <sub>6</sub>               | 1                   | Catechin                                                  | 161/163/174/192 | HMDB0002780                             |

|    |       |          |          |       |                                                  |   |                                                                                  |                         |                                    |
|----|-------|----------|----------|-------|--------------------------------------------------|---|----------------------------------------------------------------------------------|-------------------------|------------------------------------|
| 16 | 7.80  | 275.1006 | -        | -     | -                                                | 4 | Unknown                                                                          | -                       | -                                  |
| 17 | 8.01  | 577.1352 | 577.1352 | 0.00  | C <sub>30</sub> H <sub>26</sub> O <sub>12</sub>  | 1 | Procyanidin B1                                                                   | -                       | (M. L. Cádiz-Gurrea et al., 2014)  |
| 18 | 8.37  | 437.2040 | 437.2028 | 2.74  | C <sub>19</sub> H <sub>34</sub> O <sub>11</sub>  | 2 | Ebracteatoside D isomer 1                                                        | 57/99/161               | -                                  |
| 19 | 8.61  | 167.0366 | 167.0350 | 9.58  | C <sub>8</sub> H <sub>8</sub> O <sub>4</sub>     | 3 | Vanillic acid                                                                    | -                       | HMDB0000484                        |
| 20 | 8.79  | 865.1988 | 865.1985 | 0.35  | C <sub>45</sub> H <sub>38</sub> O <sub>18</sub>  | 2 | Procyanidin C                                                                    | 289/577                 | (M. L. Cádiz-Gurrea et al., 2014)  |
| 21 | 9.18  | 305.0690 | 305.0667 | 7.54  | C <sub>15</sub> H <sub>14</sub> O <sub>7</sub>   | 1 | Epigallocatechin                                                                 | 225/67/59               | (Zhang et al., 2018)               |
| 22 | 9.51  | 437.2057 | 437.2028 | 6.63  | C <sub>19</sub> H <sub>34</sub> O <sub>11</sub>  | 2 | Ebracteatoside D isomer 2                                                        | 57/99/161               | -                                  |
| 23 | 9.70  | 737.1750 | 737.1723 | 3.66  | C <sub>36</sub> H <sub>34</sub> O <sub>17</sub>  | 2 | (Epi)catechin dimer hexose                                                       | 449/611/539/289         | (M. L. Cádiz-Gurrea et al., 2014)  |
| 24 | 9.85  | 463.0878 | 463.0882 | -0.86 | C <sub>21</sub> H <sub>20</sub> O <sub>12</sub>  | 1 | Quercetin glucoside                                                              | 149/242/271/285/300/335 | HMDB0037362                        |
| 25 | 9.93  | 707.1787 | 707.1828 | -5.80 | C <sub>32</sub> H <sub>36</sub> O <sub>18</sub>  | 2 | Kalambroside A                                                                   | 449/539/581/289         | Pubchem: 10349838                  |
| 26 | 9.99  | 516.2476 | 516.2450 | 5.04  | C <sub>24</sub> H <sub>39</sub> NO <sub>11</sub> | 4 | Unknown                                                                          | -                       | (M. L. Cádiz-Gurrea et al., 20) 14 |
| 27 | 10.18 | 326.1075 | 326.1034 | 12.57 | C <sub>18</sub> H <sub>17</sub> NO <sub>5</sub>  | 2 | Deoxyclovamide (N-[(2E)-3-(3,4-Dihydroxyphenyl)-1-oxo-2-propen-1-yl]-L-tyrosine) | 206/282/119             | (M. L. Cádiz-Gurrea et al., 2014)  |
| 28 | 10.24 | 433.0806 | 433.0776 | 6.93  | C <sub>20</sub> H <sub>18</sub> O <sub>11</sub>  | 2 | Quercetin arabinoside                                                            | 300/271                 | (M. L. Cádiz-Gurrea et al., 2014)  |
| 29 | 10.45 | 238.1091 | 238.1085 | 2.52  | C <sub>12</sub> H <sub>17</sub> NO <sub>4</sub>  | 3 | Dihydroisoflavipucine                                                            | -                       | Pubchem: 38354263                  |
| 30 | 10.75 | 272.0935 | 272.0928 | 2.57  | C <sub>15</sub> H <sub>15</sub> NO <sub>4</sub>  | 2 | L-Thyronine                                                                      | 94/124                  | HMDB0000667                        |
| 31 | 11.09 | 421.2064 | 421.2079 | -3.56 | C <sub>19</sub> H <sub>34</sub> O <sub>10</sub>  | 2 | 1-Octen-3-yl primeveroside                                                       | 57/97/277               | HMDB0032960                        |

|    |       |          |          |       |                                                               |   |                                                               |            |                                   |
|----|-------|----------|----------|-------|---------------------------------------------------------------|---|---------------------------------------------------------------|------------|-----------------------------------|
| 32 | 12.16 | 301.0339 | 301.0354 | -4.98 | C <sub>15</sub> H <sub>10</sub> O <sub>7</sub>                | 1 | Quercetin                                                     | 151/121/65 | HMDB0005794                       |
| 33 | 12.36 | 391.1196 | 391.1187 | 2.30  | C <sub>23</sub> H <sub>20</sub> O <sub>6</sub>                | 2 | Dehydrodeguelin                                               | 117/62     | (Bini et al., 2023)               |
| 34 | 12.46 | 329.2329 | 329.2333 | -1.21 | C <sub>18</sub> H <sub>34</sub> O <sub>5</sub>                | 2 | 5,8,12-Trihydroxy-9-octadecenoic acid isomer 1                | 211        | HMDB0030936                       |
| 35 | 12.57 | 329.2358 | 329.2333 | 7.59  | C <sub>18</sub> H <sub>34</sub> O <sub>5</sub>                | 2 | 5,8,12-Trihydroxy-9-octadecenoic acid isomer 2                | 211        | HMDB0030936                       |
| 36 | 12.79 | 357.1215 | 357.1191 | 6.72  | C <sub>16</sub> H <sub>22</sub> O <sub>9</sub>                | 2 | Sweroside                                                     | 97/198     | (M. L. Cádiz-Gurrea et al., 2014) |
| 37 | 13.13 | 394.2954 | 394.2963 | -2.28 | C <sub>23</sub> H <sub>41</sub> NO <sub>4</sub>               | 4 | Unknown                                                       | -          | -                                 |
| 38 | 13.47 | 276.1227 | 276.1241 | -5.07 | C <sub>15</sub> H <sub>19</sub> NO <sub>4</sub>               | 3 | Barmumycin                                                    | -          | (Lorente et al., 2010)            |
| 39 | 13.92 | 293.1748 | 293.1758 | -3.41 | C <sub>17</sub> H <sub>26</sub> O <sub>4</sub>                | 2 | Gingerol                                                      | 236/221    | HMDB0005783                       |
| 40 | 14.07 | 333.1815 | 333.1820 | -1.50 | C <sub>18</sub> H <sub>26</sub> N <sub>2</sub> O <sub>4</sub> | 3 | Hydroxyhuperzine                                              | -          | (Jiang et al., 2010)              |
| 41 | 14.20 | 367.1671 | 367.1663 | 2.18  | C <sub>21</sub> H <sub>24</sub> N <sub>2</sub> O <sub>4</sub> | 3 | 3,4-dimethoxy-N-[4-[oxo(1-piperidinyl)methyl]phenyl]benzamide | -          | CHEBI:114263                      |
| 42 | 14.77 | 195.0686 | 195.0663 | 11.79 | C <sub>10</sub> H <sub>12</sub> O <sub>4</sub>                | 2 | Ethyl vanillate                                               | 123        | (Schwarz et al., 2021)            |
| 43 | 15.61 | 564.3295 | -        | -     | -                                                             | 4 | Unknown                                                       | -          | -                                 |
| 44 | 15.71 | 476.2780 | 476.2780 | 0.00  | C <sub>27</sub> H <sub>41</sub> O <sub>7</sub>                | 2 | Sinapoyloxypalmitate                                          | 279        | Pubchem: 90657145                 |
| 45 | 15.83 | 564.3292 | -        | -     | -                                                             | 4 | Unknown                                                       | -          | -                                 |
| 46 | 16.30 | 540.3288 | -        | -     | -                                                             | 4 | Unknown                                                       | -          | -                                 |
| 47 | 16.60 | 566.3492 | -        | -     | -                                                             | 4 | Unknown                                                       | -          | -                                 |
| 48 | 17.58 | 299.2585 | 299.2592 | -2.34 | C <sub>18</sub> H <sub>36</sub> O <sub>3</sub>                | 3 | Hydroxyoctadecanoic acid                                      | -          | HMDB0112182                       |
| 49 | 17.81 | 297.2424 | 297.2435 | -3.70 | C <sub>18</sub> H <sub>34</sub> O <sub>3</sub>                | 2 | Oxooctadecanoic acid                                          | 253/155    | HMDB0030981                       |

|    |       |          |          |        |                                                 |   |                             |         |                   |
|----|-------|----------|----------|--------|-------------------------------------------------|---|-----------------------------|---------|-------------------|
| 50 | 18.46 | 277.2159 | 277.2173 | -5.05  | C <sub>18</sub> H <sub>30</sub> O <sub>2</sub>  | 2 | Linolenic acid              | 205/97  | HMDB0001388       |
| 51 | 18.73 | 375.2712 | 375.2752 | -10.66 | C <sub>20</sub> H <sub>40</sub> O <sub>6</sub>  | 2 | Myristyl glucoside          | 291/311 | Pubchem: 6453025  |
| 52 | 19.16 | 279.2328 | 279.2330 | -0.72  | C <sub>18</sub> H <sub>32</sub> O <sub>2</sub>  | 3 | Linoleic acid               | -       | HMDB0000673       |
| 53 | 19.82 | 255.2325 | 255.2330 | -1.96  | C <sub>16</sub> H <sub>32</sub> O <sub>2</sub>  | 2 | Palmitic acid               | 190/110 | HMDB0000220       |
| 54 | 19.87 | 403.3052 | 403.3065 | -3.22  | C <sub>22</sub> H <sub>44</sub> O <sub>6</sub>  | 3 | Hexadecyl D-glucoside       | -       | Pubchem: 171356   |
| 55 | 19.95 | 281.2482 | 281.2486 | -1.42  | C <sub>18</sub> H <sub>34</sub> O <sub>2</sub>  | 2 | Oleic Acid                  | 211/101 | HMDB0000207       |
| 56 | 20.98 | 383.1934 | 383.1923 | 2.87   | C <sub>16</sub> H <sub>32</sub> O <sub>10</sub> | 3 | Hexanedioic acid derivative | -       | Pubchem: 88032455 |

RT: Retention Time; Mol. Formula: Molecular Formula

**Table S2.** Identification of phytochemical compounds in *H. sabdariffa* extract by HPLC-ESI-qTOF-MS.

| Peak | RT (min) | Observed [M-H]- | Theoretical [M-H]- | Mass error (ppm) | Mol. Formula                                    | Level of annotation | Compounds                               | MS/MS fragments | References                      |
|------|----------|-----------------|--------------------|------------------|-------------------------------------------------|---------------------|-----------------------------------------|-----------------|---------------------------------|
| 1    | 0.96     | 132.0302        | 132.0302           | 0.00             | C <sub>4</sub> H <sub>7</sub> NO <sub>4</sub>   | 2                   | Aspartic Acid                           | 88/71           | HMDB0000191                     |
| 2    | 0.99     | 294.0807        | 294.0831           | -8.16            | C <sub>10</sub> H <sub>17</sub> NO <sub>9</sub> | 2                   | Fructose-aspartic acid                  | 132/88          | (Luo et al., 2020)              |
| 3    | 1.07     | 207.0150        | 207.0146           | 1.93             | C <sub>6</sub> H <sub>8</sub> O <sub>8</sub>    | 2                   | Hibiscus acid isomer 1                  | 189/127         | HMDB0031159                     |
| 4    | 1.15     | 207.0159        | 207.0146           | 6.28             | C <sub>6</sub> H <sub>8</sub> O <sub>8</sub>    | 2                   | Hibiscus acid isomer 2                  | 189/127         | HMDB0031159                     |
| 5    | 1.32     | 189.0078        | 189.0041           | 19.58            | C <sub>6</sub> H <sub>6</sub> O <sub>7</sub>    | 2                   | Hibiscus acid lactone                   | 127             | (Rodríguez-Medina et al., 2009) |
| 6    | 1.66     | 203.0215        | 203.0197           | 8.87             | C <sub>7</sub> H <sub>8</sub> O <sub>7</sub>    | 2                   | Hibiscus acid monomethyl ester isomer 1 | 142/157/201     | (Hifnawy et al., 2020)          |
| 7    | 1.82     | 203.0215        | 203.0197           | 8.87             | C <sub>7</sub> H <sub>8</sub> O <sub>7</sub>    | 2                   | Hibiscus acid monomethyl ester isomer 2 | 142/157/201     | (Hifnawy et al., 2020)          |
| 8    | 2.63     | 217.0332        | 217.0354           | -10.14           | C <sub>8</sub> H <sub>10</sub> O <sub>7</sub>   | 2                   | Hibiscus acid dimethylester             | 155/125         | (Villegas-Aguilar et al., 2020) |
| 9    | 4.02     | 353.0867        | 353.0878           | -3.12            | C <sub>16</sub> H <sub>18</sub> O <sub>9</sub>  | 2                   | Chlorogenic acid isomer 1               | 191/135         | HMDB0003164                     |
| 10   | 4.20     | 297.0266        | 297.0252           | 4.71             | C <sub>12</sub> H <sub>10</sub> O <sub>9</sub>  | 2                   | Methyl gallate derivative isomer 1      | 125/82          | (Pierson et al., 2014)          |
| 11   | 4.98     | 297.0266        | 297.0252           | 4.71             | C <sub>12</sub> H <sub>10</sub> O <sub>9</sub>  | 2                   | Methyl gallate derivative isomer 2      | 125/82          | (Pierson et al., 2014)          |
| 12   | 6.34     | 353.0867        | 353.0878           | -3.12            | C <sub>16</sub> H <sub>18</sub> O <sub>9</sub>  | 2                   | Chlorogenic acid isomer 2               | 191/135         | HMDB0003164                     |
| 13   | 6.89     | 353.0867        | 353.0878           | -3.12            | C <sub>16</sub> H <sub>18</sub> O <sub>9</sub>  | 2                   | Chlorogenic acid isomer 3               | 191/135         | HMDB0003164                     |
| 14   | 8.56     | 335.0771        | 335.0772           | -0.30            | C <sub>16</sub> H <sub>16</sub> O <sub>8</sub>  | 2                   | 5-O-Caffeoylshikimic acid               | 161/191/133     | (Villegas-Aguilar et al., 2020) |

|    |       |          |          |        |                                                  |   |                                |             |                     |
|----|-------|----------|----------|--------|--------------------------------------------------|---|--------------------------------|-------------|---------------------|
| 15 | 8.90  | 367.1030 | 367.1035 | -1.36  | C <sub>17</sub> H <sub>20</sub> O <sub>9</sub>   | 2 | 3-O-Feruloylquinic acid        | 135/179     | HMDB0030669         |
| 16 | 9.60  | 609.1458 | 609.1461 | -0.49  | C <sub>27</sub> H <sub>30</sub> O <sub>16</sub>  | 3 | Quercetin 3-O-rutinoside       | -           | HMDB0037934         |
| 17 | 9.84  | 463.0884 | 463.0882 | 0.43   | C <sub>21</sub> H <sub>20</sub> O <sub>12</sub>  | 2 | Quercetin 7-glucoside          | 301/463     | HMDB0302151         |
| 18 | 10.23 | 539.1751 | 539.1770 | -3.52  | C <sub>25</sub> H <sub>32</sub> O <sub>13</sub>  | 3 | Oleuropein                     | -           | HMDB0035872         |
| 19 | 10.96 | 317.0294 | 317.0303 | -2.84  | C <sub>15</sub> H <sub>10</sub> O <sub>8</sub>   | 2 | Myrecetin                      | 151/107     | HMDB0002755         |
| 20 | 11.07 | 312.1239 | 312.1241 | -0.64  | C <sub>18</sub> H <sub>19</sub> NO <sub>4</sub>  | 2 | N-Feruloyltyramine             | 148/190     | Pubchem:<br>6440659 |
| 21 | 12.04 | 522.3276 | 522.3283 | -1.34  | C <sub>25</sub> H <sub>49</sub> NO <sub>10</sub> | 4 | Unknown                        | -           | -                   |
| 22 | 12.15 | 301.0339 | 301.0354 | -4.98  | C <sub>15</sub> H <sub>10</sub> O <sub>7</sub>   | 1 | Quercetin                      | 151/121/65  | HMDB0005794         |
| 23 | 12.95 | 329.0654 | 329.0667 | -3.95  | C <sub>17</sub> H <sub>14</sub> O <sub>7</sub>   | 2 | 3,7-Dimethylquercetin          | 285/299/314 | HMDB0029263         |
| 24 | 13.05 | 299.0538 | 299.0561 | -7.69  | C <sub>16</sub> H <sub>12</sub> O <sub>6</sub>   | 3 | Kaempferide                    | -           | Pubchem:<br>5281666 |
| 25 | 13.13 | 394.2945 | 394.2936 | 2.28   | C <sub>20</sub> H <sub>43</sub> O <sub>7</sub>   | 4 | Unknown                        | -           | -                   |
| 26 | 13.56 | 343.0821 | 343.0823 | -0.58  | C <sub>18</sub> H <sub>16</sub> O <sub>7</sub>   | 3 | Eupatorin isomer 1             | -           | HMDB0252128         |
| 27 | 13.61 | 343.0818 | 343.0823 | -1.46  | C <sub>18</sub> H <sub>16</sub> O <sub>7</sub>   | 3 | Eupatorin isomer 2             | -           | HMDB0252128         |
| 28 | 13.69 | 313.0684 | 313.0718 | -10.86 | C <sub>17</sub> H <sub>14</sub> O <sub>6</sub>   | 3 | Cirsimaritin                   | -           | Pubchem: 188323     |
| 29 | 13.92 | 293.1767 | 293.1758 | 3.07   | C <sub>17</sub> H <sub>26</sub> O <sub>4</sub>   | 3 | Gingerol                       | 236/221     | HMDB0005783         |
| 30 | 15.74 | 293.2107 | 293.2122 | -5.12  | C <sub>18</sub> H <sub>30</sub> O <sub>3</sub>   | 3 | Hydroxylinolenic acid isomer 1 | -           | HMDB0011108         |
| 31 | 15.81 | 293.2119 | 293.2122 | -1.02  | C <sub>18</sub> H <sub>30</sub> O <sub>3</sub>   | 3 | Hydroxylinolenic acid isomer 2 | -           | HMDB0011108         |
| 32 | 15.85 | 293.2113 | 293.2122 | -3.07  | C <sub>18</sub> H <sub>30</sub> O <sub>3</sub>   | 3 | Hydroxylinolenic acid isomer 3 | -           | HMDB0011108         |
| 33 | 16.41 | 295.2265 | 295.2279 | -4.74  | C <sub>18</sub> H <sub>32</sub> O <sub>3</sub>   | 3 | Hydroxylinoleic acid           | -           | HMDB0247599         |
| 34 | 18.46 | 277.2159 | 277.2173 | -5.05  | C <sub>18</sub> H <sub>30</sub> O <sub>2</sub>   | 2 | Linolenic acid                 | 205/97      | HMDB0001388         |



|    |       |          |          |        |                                                 |   |                             |         |                      |
|----|-------|----------|----------|--------|-------------------------------------------------|---|-----------------------------|---------|----------------------|
| 35 | 18.73 | 375.2712 | 375.2752 | -10.66 | C <sub>20</sub> H <sub>40</sub> O <sub>6</sub>  | 2 | Myristyl glucoside          | 291/311 | Pubchem:<br>6453025  |
| 36 | 19.15 | 279.2328 | 279.2330 | -0.72  | C <sub>18</sub> H <sub>32</sub> O <sub>2</sub>  | 3 | Linoleic acid               | -       | HMDB0000673          |
| 37 | 19.86 | 403.3052 | 403.3065 | -3.22  | C <sub>22</sub> H <sub>44</sub> O <sub>6</sub>  | 3 | Hexadecyl D-glucoside       | -       | Pubchem: 171356      |
| 38 | 19.94 | 281.2508 | 281.2486 | 7.82   | C <sub>18</sub> H <sub>34</sub> O <sub>2</sub>  | 2 | Oleic Acid                  | 211/101 | HMDB0000207          |
| 39 | 20.81 | 443.2490 | 443.2439 | 11.51  | C <sub>26</sub> H <sub>36</sub> O <sub>6</sub>  | 3 | Bufotalin                   | -       | Pubchem:<br>12302120 |
| 40 | 20.97 | 383.1916 | 383.1923 | -1.83  | C <sub>16</sub> H <sub>32</sub> O <sub>10</sub> | 3 | Hexanedioic acid derivative | -       | Pubchem:<br>88032455 |

RT: Retention Time; Mol. Formula: Molecular Formula

**Table S3.** Identification of phytochemical compounds in *S. marianum* extract by HPLC-ESI-qTOF-MS.

|    | RT (min) | Observed [M-H]- | Theoretical [M-H]- | Mass error (ppm) | Mol. Formula                                                  | Level of annotation | Compounds                           | MS/MS fragments | References              |
|----|----------|-----------------|--------------------|------------------|---------------------------------------------------------------|---------------------|-------------------------------------|-----------------|-------------------------|
| 1  | 0.80     | 112.9866        | 112.9880           | -12.39           | C <sub>4</sub> H <sub>2</sub> O <sub>4</sub>                  | 3                   | Acetylenedicarboxylic acid          | -               | HMDB0247933             |
| 2  | 0.90     | 134.0479        | 134.0472           | 5.22             | C <sub>5</sub> H <sub>5</sub> N <sub>5</sub>                  | 3                   | Adenine                             | -               | HMDB0000034             |
| 3  | 0.99     | 179.0556        | 179.0561           | -2.79            | C <sub>6</sub> H <sub>12</sub> O <sub>6</sub>                 | 3                   | Fructose                            | -               | HMDB0000660             |
| 4  | 1.06     | 266.0883        | 266.0894           | -4.13            | C <sub>10</sub> H <sub>13</sub> N <sub>5</sub> O <sub>4</sub> | 3                   | Adenosine                           | -               | HMDB0000050             |
| 5  | 1.09     | 117.0130        | -                  | -                | -                                                             | 4                   | Unknown                             | -               | -                       |
| 6  | 1.32     | 197.8088        | -                  | -                | -                                                             | 4                   | Unknown                             | -               | -                       |
| 7  | 6.57     | 303.0492        | 303.0510           | -5.94            | C <sub>15</sub> H <sub>12</sub> O <sub>7</sub>                | 2                   | Dihydroquercetin                    | 285/125         | (Ferysiuk et al., 2020) |
| 8  | 6.87     | 353.0881        | 353.0878           | 0.85             | C <sub>16</sub> H <sub>18</sub> O <sub>9</sub>                | 2                   | Chlorogenic acid                    | 191/161         | HMDB0003164             |
| 9  | 7.75     | 373.1487        | 373.1504           | -4.56            | C <sub>17</sub> H <sub>26</sub> O <sub>9</sub>                | 2                   | Deoxyloganin                        | 165/135         | Pubchem: 440906         |
| 10 | 7.93     | 441.1949        | 441.1978           | -6.57            | C <sub>18</sub> H <sub>34</sub> O <sub>12</sub>               | 2                   | Hexo-Glucose                        | 395/249         | Pubchem: 129630443      |
| 11 | 8.05     | 505.1915        | 505.1927           | -2.38            | C <sub>22</sub> H <sub>34</sub> O <sub>13</sub>               | 2                   | Oleuropeic acid derivative isomer 1 | 459/293         | (Tian et al., 2009)     |
| 12 | 8.41     | 475.1843        | 475.1821           | 4.63             | C <sub>21</sub> H <sub>32</sub> O <sub>12</sub>               | 3                   | Cistanoside E                       | -               | Pubchem: 21632979       |
| 13 | 8.58     | 505.1935        | 505.1927           | 1.58             | C <sub>22</sub> H <sub>34</sub> O <sub>13</sub>               | 2                   | Oleuropeic acid derivative isomer 2 | 459/293         | (Tian et al., 2009)     |
| 14 | 8.92     | 459.1856        | 459.1872           | -3.48            | C <sub>21</sub> H <sub>32</sub> O <sub>11</sub>               | 2                   | Apiosylepirhododendrin              | 89/59           | Pubchem: 101287073      |
| 15 | 8.99     | 163.0389        | 163.0401           | -7.36            | C <sub>9</sub> H <sub>8</sub> O <sub>3</sub>                  | 2                   | 4-Hydroxycinnamic acid              | 119             | HMDB0002035             |
| 16 | 9.12     | 193.0141        | 193.0142           | -0.52            | C <sub>9</sub> H <sub>6</sub> O <sub>5</sub>                  | 2                   | Trihydroxycoumarin                  | 137/93          | (Waseem et al., 2021)   |
| 17 | 9.26     | 481.1161        | 481.1140           | 4.36             | C <sub>25</sub> H <sub>22</sub> O <sub>10</sub>               | 2                   | Silybin isomer 1                    | 125/178         | MoNA:VF-NPL-QTOF009680  |

|    |       |          |          |        |                                                               |   |                                         |                         |                            |
|----|-------|----------|----------|--------|---------------------------------------------------------------|---|-----------------------------------------|-------------------------|----------------------------|
| 18 | 9.42  | 455.2130 | 455.2134 | -0.88  | C <sub>19</sub> H <sub>36</sub> O <sub>12</sub>               | 3 | Alkyl glycoside                         | -                       | (Vidal & Ccapatinta, 2018) |
| 19 | 9.58  | 303.0512 | 303.0510 | 0.66   | C <sub>15</sub> H <sub>12</sub> O <sub>7</sub>                | 2 | Dihydroquercetin                        | 285/125                 | (Ferysiuk et al., 2020)    |
| 20 | 9.73  | 607.1081 | 607.1093 | -1.98  | C <sub>30</sub> H <sub>24</sub> O <sub>14</sub>               | 2 | (Epi)gallocatechin-A-(epi)gallocatechin | 285/303                 | (Singh et al., 2018)       |
| 21 | 9.82  | 187.0957 | 187.0976 | -10.16 | C <sub>9</sub> H <sub>16</sub> O <sub>4</sub>                 | 3 | Azelaic acid                            | -                       | HMDB0000784                |
| 22 | 9.87  | 433.1123 | 433.1140 | -3.93  | C <sub>21</sub> H <sub>22</sub> O <sub>10</sub>               | 2 | Naringenin 4'-O-glucoside               | 271/151                 | Pubchem: 42607906          |
| 23 | 10.12 | 481.1125 | 481.1140 | -3.12  | C <sub>25</sub> H <sub>22</sub> O <sub>10</sub>               | 2 | Silybin isomer 2                        | 125/178                 | MoNA:VF-NPL-QTOF009680     |
| 24 | 10.25 | 483.1293 | 483.1297 | -0.83  | C <sub>25</sub> H <sub>24</sub> O <sub>10</sub>               | 2 | Silybin hydrogenated                    | 125/151/285             | (Vrba et al., 2018)        |
| 25 | 10.35 | 813.3162 | 813.3187 | -3.07  | C <sub>38</sub> H <sub>54</sub> O <sub>19</sub>               | 2 | Tricrocin                               | 767/473                 | Pubchem: 22833598          |
| 26 | 10.46 | 383.1604 | 383.1612 | -2.09  | C <sub>21</sub> H <sub>24</sub> N <sub>2</sub> O <sub>5</sub> | 3 | Alscomine                               | -                       | Pubchem: 11969856          |
| 27 | 10.54 | 675.3212 | 675.3174 | 5.63   | C <sub>39</sub> H <sub>48</sub> O <sub>10</sub>               | 2 | Gambogic acid A                         | 629/293                 | ChemBK: 1592842-93-7       |
| 28 | 10.61 | 481.1120 | 481.1140 | -4.16  | C <sub>25</sub> H <sub>22</sub> O <sub>10</sub>               | 2 | Silybin isomer 3                        | 125/178                 | MoNA:VF-NPL-QTOF009680     |
| 29 | 10.69 | 287.0516 | 287.0561 | -15.68 | C <sub>15</sub> H <sub>12</sub> O <sub>6</sub>                | 2 | Aromadendrin                            | 125/259                 | HMDB0030847                |
| 30 | 10.75 | 317.0655 | 317.0667 | -3.78  | C <sub>16</sub> H <sub>14</sub> O <sub>7</sub>                | 2 | (+)-Dihydroisorhamnetin                 | 245/259                 | HMDB0037501                |
| 31 | 10.96 | 481.1114 | 481.1140 | -5.40  | C <sub>25</sub> H <sub>22</sub> O <sub>10</sub>               | 2 | Silychrystin isomer 1                   | 151/125                 | MoNA:RIKENPIaSMA007844     |
| 32 | 11.00 | 481.1139 | 481.1140 | -0.21  | C <sub>25</sub> H <sub>22</sub> O <sub>10</sub>               | 2 | Silybin isomer 3                        | 125/178                 | MoNA:VF-NPL-QTOF009680     |
| 33 | 11.03 | 481.1150 | 481.1140 | 2.08   | C <sub>25</sub> H <sub>22</sub> O <sub>10</sub>               | 2 | Silychrystin isomer 2                   | 107/125/151/325/463     | MoNA:RIKENPIaSMA007844     |
| 34 | 11.08 | 481.1146 | 481.1140 | 1.25   | C <sub>25</sub> H <sub>22</sub> O <sub>10</sub>               | 2 | Silychrystin isomer 3                   | 125/151/178/325/355/433 | MoNA:MetaboBASE0687        |
| 35 | 11.54 | 677.1892 | 677.1876 | 2.36   | C <sub>35</sub> H <sub>34</sub> O <sub>14</sub>               | 4 | Unknown                                 | -                       | -                          |

|    |       |          |          |       |                                                 |   |                                                               |                         |                        |
|----|-------|----------|----------|-------|-------------------------------------------------|---|---------------------------------------------------------------|-------------------------|------------------------|
| 36 | 11.85 | 685.3060 | 685.3077 | -2.48 | C <sub>33</sub> H <sub>50</sub> O <sub>15</sub> | 2 | Pterocecide B                                                 | 477/639                 | Pubchem: 122228272     |
| 37 | 11.90 | 659.1765 | 659.1770 | -0.76 | C <sub>35</sub> H <sub>32</sub> O <sub>13</sub> | 2 | Phylloflavanine                                               | 178/125                 | (Foo, 1987)            |
| 38 | 12.06 | 481.1130 | 481.1140 | -2.08 | C <sub>25</sub> H <sub>22</sub> O <sub>10</sub> | 2 | Silybin isomer 4                                              | 125/152/301             | MoNA:VF-NPL-QTOF009680 |
| 39 | 12.12 | 481.1176 | 481.1140 | 7.48  | C <sub>25</sub> H <sub>22</sub> O <sub>10</sub> | 2 | Silybin isomer 5                                              | 125/152/301             | MoNA:VF-NPL-QTOF009680 |
| 40 | 12.26 | 481.1172 | 481.1140 | 6.65  | C <sub>25</sub> H <sub>22</sub> O <sub>10</sub> | 2 | Silybin isomer 6                                              | 125/152/273             | MoNA:VF-NPL-QTOF009680 |
| 41 | 12.34 | 481.1158 | 481.1140 | 3.74  | C <sub>25</sub> H <sub>22</sub> O <sub>10</sub> | 2 | Silybin isomer 7                                              | 125/152/301             | MoNA:VF-NPL-QTOF009680 |
| 42 | 12.44 | 481.1120 | 481.1140 | -4.16 | C <sub>25</sub> H <sub>22</sub> O <sub>10</sub> | 2 | Silybin isomer 8                                              | 125/152/301             | MoNA:VF-NPL-QTOF009680 |
| 43 | 12.48 | 481.1156 | 481.1140 | 3.33  | C <sub>25</sub> H <sub>22</sub> O <sub>10</sub> | 2 | Silybin isomer 9                                              | 125/152/301             | MoNA:VF-NPL-QTOF009680 |
| 44 | 12.67 | 381.2269 | 381.2282 | -3.41 | C <sub>21</sub> H <sub>34</sub> O <sub>6</sub>  | 3 | Sarcostin                                                     | -                       | Pubchem: 46173994      |
| 45 | 12.94 | 477.0837 | 477.0827 | 2.10  | C <sub>25</sub> H <sub>18</sub> O <sub>10</sub> | 3 | Pradinone I                                                   | -                       | Pubchem: 460846        |
| 46 | 13.01 | 477.2489 | 477.2494 | -1.05 | C <sub>26</sub> H <sub>38</sub> O <sub>8</sub>  | 3 | Adenanthin B isomer 1                                         | -                       | (Hu et al., 2019)      |
| 47 | 13.12 | 811.1896 | 811.1938 | -5.18 | C <sub>35</sub> H <sub>40</sub> O <sub>22</sub> | 3 | Kaempferol 3-[2''-glucosyl-6''-acetylgalactoside] 7-glucoside | -                       | FDB016214              |
| 48 | 13.42 | 989.2502 | 989.2510 | -0.81 | C <sub>52</sub> H <sub>46</sub> O <sub>20</sub> | 4 | Unknown                                                       | -                       | -                      |
| 49 | 13.70 | 523.1249 | 523.1246 | 0.57  | C <sub>27</sub> H <sub>24</sub> O <sub>11</sub> | 3 | Acetylsilybin A/B                                             | -                       | Pubchem: 10236891      |
| 50 | 13.78 | 477.2522 | 477.2493 | 6.08  | C <sub>26</sub> H <sub>38</sub> O <sub>8</sub>  | 3 | Adenanthin B isomer 2                                         | -                       | (Hu et al., 2019)      |
| 51 | 14.14 | 479.0975 | 479.0984 | -1.88 | C <sub>25</sub> H <sub>20</sub> O <sub>10</sub> | 2 | Dehydrosilybin                                                | 125/177/179/283/327/449 | HMDB0040513            |
| 52 | 14.87 | 627.1569 | 627.1567 | 0.32  | C <sub>27</sub> H <sub>32</sub> O <sub>17</sub> | 2 | Vitexia-glucoside                                             | 152/271/435/463         | Pubchem: 56933064      |
| 53 | 15.02 | 313.2378 | 313.2384 | -1.92 | C <sub>18</sub> H <sub>34</sub> O <sub>4</sub>  | 3 | Octadecanedioic acid                                          | -                       | Pubchem: 70095         |
| 54 | 15.61 | 564.3351 | -        | -     | -                                               | 4 | Unknown                                                       | -                       | -                      |
| 55 | 15.71 | 476.2772 | 476.2780 | -1.68 | C <sub>27</sub> H <sub>41</sub> O <sub>7</sub>  | 3 | Sinapoyloxypalmitate                                          | -                       | Pubchem: 90657145      |

|    |       |          |          |        |                                                 |   |                         |         |                                      |
|----|-------|----------|----------|--------|-------------------------------------------------|---|-------------------------|---------|--------------------------------------|
| 56 | 15.83 | 564.3364 | -        | -      | -                                               | 4 | Unknown                 | -       | -                                    |
| 57 | 16.04 | 540.3289 | 540.3304 | -2.78  | C <sub>29</sub> H <sub>49</sub> O <sub>9</sub>  | 3 | Steroid compound        | -       | (Hendriani & Yulinah Sukandar, 2016) |
| 58 | 16.30 | 540.3306 | 540.3304 | 0.37   | C <sub>29</sub> H <sub>49</sub> O <sub>9</sub>  | 3 | Steroid compound        | -       | (Hendriani & Yulinah Sukandar, 2016) |
| 59 | 16.37 | 566.3453 | -        | -      | -                                               | 4 | Unknown                 | -       | -                                    |
| 60 | 16.60 | 566.3530 | -        | -      | -                                               | 4 | Unknown                 | -       | -                                    |
| 61 | 18.66 | 591.4117 | 591.4114 | 0.51   | C <sub>31</sub> H <sub>60</sub> O <sub>10</sub> | 4 | Unknown                 | -       | -                                    |
| 62 | 18.73 | 375.2712 | 375.2752 | -10.66 | C <sub>20</sub> H <sub>40</sub> O <sub>6</sub>  | 2 | Myristyl glucoside      | 291/311 | Pubchem: 6453025                     |
| 63 | 19.16 | 279.2328 | 279.2330 | -0.72  | C <sub>18</sub> H <sub>32</sub> O <sub>2</sub>  | 3 | Linoleic acid           | -       | HMDB0000673                          |
| 64 | 19.74 | 577.3730 | 577.3746 | -2.77  | C <sub>33</sub> H <sub>54</sub> O <sub>8</sub>  | 3 | Timosaponin A           | -       | (Wang et al., 2021)                  |
| 65 | 19.85 | 403.3052 | 403.3065 | -3.22  | C <sub>22</sub> H <sub>44</sub> O <sub>6</sub>  | 3 | Hexadecyl D-glucoside   | -       | Pubchem: 171356                      |
| 66 | 19.94 | 281.2508 | 281.2486 | 7.82   | C <sub>18</sub> H <sub>34</sub> O <sub>2</sub>  | 2 | Oleic Acid              | 211/101 | HMDB0000207                          |
| 67 | 20.62 | 605.4040 | 605.4059 | -3.14  | C <sub>35</sub> H <sub>58</sub> O <sub>8</sub>  | 3 | Deoxybafilomycin A1     | -       | CAS: 1883587-79-8                    |
| 68 | 20.98 | 621.4417 | 621.4372 | 7.24   | C <sub>36</sub> H <sub>62</sub> O <sub>8</sub>  | 3 | Ginsenoside Rh2         | -       | Pubchem:119307                       |
| 69 | 21.56 | 633.4375 | 633.4371 | 0.63   | C <sub>37</sub> H <sub>62</sub> O <sub>8</sub>  | 3 | Karaviloside III        | -       | CHEMBL2335924                        |
| 70 | 22.92 | 371.2592 | 371.2592 | 0.00   | C <sub>24</sub> H <sub>36</sub> O <sub>3</sub>  | 3 | Pelandjauc acid         | -       | Pubchem: 178575                      |
| 71 | 24.49 | 373.2751 | 373.2748 | 0.80   | C <sub>24</sub> H <sub>38</sub> O <sub>3</sub>  | 3 | Dehydrolithocholic acid | -       | Pubchem: 4446994                     |

RT: Retention Time; Mol. Formula: Molecular Formula

**Table S4.** Identification of phytochemical compounds in *L. citriodora* extract by HPLC-ESI-qTOF-MS.

| Peak | Rt (min) | Observed [M-H]- | Theoretical [M-H]- | Mass error (ppm) | Mol. Formula                                    | Level of annotation | Compounds                | MS/MS fragments     | References                    |
|------|----------|-----------------|--------------------|------------------|-------------------------------------------------|---------------------|--------------------------|---------------------|-------------------------------|
| 1    | 1.01     | 195.0511        | 195.0510           | 0.51             | C <sub>6</sub> H <sub>12</sub> O <sub>7</sub>   | 2                   | Gluconic acid            | 75/105/177          | HMDB0184581                   |
| 2    | 1.07     | 133.014         | 133.0142           | -1.50            | C <sub>4</sub> H <sub>6</sub> O <sub>5</sub>    | 3                   | Malic acid isomer 1      | -                   | CAS: 6915-15-7                |
| 3    | 1.14     | 133.0141        | 133.0142           | -0.75            | C <sub>4</sub> H <sub>6</sub> O <sub>6</sub>    | 3                   | Malic acid isomer 2      | -                   | CAS: 6915-15-7                |
| 4    | 1.27     | 317.0452        | 317.0514           | -19.56           | C <sub>12</sub> H <sub>14</sub> O <sub>10</sub> | 4                   | Unknown                  | -                   | -                             |
| 5    | 1.47     | 303.8787        | -                  | -                | -                                               | 4                   | Unknown                  | -                   | -                             |
| 6    | 2.07     | 391.1232        | 391.1246           | -3.58            | C <sub>16</sub> H <sub>24</sub> O <sub>11</sub> | 2                   | Shanziside               | 229/185/167/149/123 | (Quirantes-Piné et al., 2010) |
| 7    | 2.73     | 373.1101        | 373.114            | -10.45           | C <sub>16</sub> H <sub>22</sub> O <sub>10</sub> | 1                   | Gardoside                | 123/149/211         | (Quirantes-Piné et al., 2010) |
| 8    | 3.35     | 461.1642        | 461.1665           | -4.99            | C <sub>20</sub> H <sub>30</sub> O <sub>12</sub> | 2                   | Verbasoside              | 135/315             | (Quirantes-Piné et al., 2010) |
| 9    | 4.90     | 389.1091        | 389.1089           | 0.51             | C <sub>16</sub> H <sub>22</sub> O <sub>11</sub> | 2                   | Theveside                | 121/69              | (Quirantes-Piné et al., 2009) |
| 10   | 5.06     | 487.1446        | 487.1457           | -2.26            | C <sub>21</sub> H <sub>28</sub> O <sub>13</sub> | 3                   | Cistanoside F            | -                   | (Quirantes-Piné et al., 2009) |
| 11   | 6.61     | 387.1617        | 387.1661           | -11.36           | C <sub>18</sub> H <sub>28</sub> O <sub>9</sub>  | 2                   | Tuberonic acid glucoside | 59/89               | Pubchem: 5281204              |
| 12   | 6.81     | 431.1916        | 431.1923           | -1.62            | C <sub>20</sub> H <sub>32</sub> O <sub>10</sub> | 3                   | Sacranoside A            | -                   | Pubchem: 102094959            |
| 13   | 7.01     | 433.2064        | 433.2079           | -3.46            | C <sub>20</sub> H <sub>34</sub> O <sub>10</sub> | 2                   | Monoterpene derivative   | 387/89              | (Li et al., 2019)             |

|    |      |          |          |        |                                                 |   |                           |                 |                               |
|----|------|----------|----------|--------|-------------------------------------------------|---|---------------------------|-----------------|-------------------------------|
| 14 | 7.41 | 225.1136 | 225.1132 | 1.78   | C <sub>12</sub> H <sub>12</sub> O <sub>4</sub>  | 2 | Eugenitin                 | 59              | Pubchem:<br>3083581           |
| 15 | 7.63 | 307.1405 | 307.1398 | 2.28   | C <sub>13</sub> H <sub>24</sub> O <sub>8</sub>  | 4 | Unknown                   | -               | -                             |
| 16 | 8.19 | 593.1497 | 593.1512 | -2.53  | C <sub>27</sub> H <sub>30</sub> O <sub>15</sub> | 3 | Kaempferol 3-O-rutinoside | -               | HMDB0302426                   |
| 17 | 8.25 | 641.2095 | 641.2087 | 1.25   | C <sub>29</sub> H <sub>38</sub> O <sub>16</sub> | 3 | Yadanzioside I            | -               | Pubchem:<br>10484290          |
| 18 | 8.37 | 435.2226 | 435.2236 | -2.30  | C <sub>20</sub> H <sub>36</sub> O <sub>10</sub> | 3 | Deniose                   | -               | Pubchem:<br>10741574          |
| 19 | 8.48 | 377.1814 | 377.1817 | -0.80  | C <sub>17</sub> H <sub>30</sub> O <sub>9</sub>  | 4 | Unknown                   | -               | -                             |
| 20 | 8.64 | 639.1863 | 639.1931 | -10.64 | C <sub>29</sub> H <sub>36</sub> O <sub>16</sub> | 3 | Plantamajoside            | -               | Pubchem:<br>5281788           |
| 21 | 8.75 | 377.1814 | 377.1817 | -0.80  | C <sub>17</sub> H <sub>30</sub> O <sub>9</sub>  | 4 | Unknown                   | -               | -                             |
| 22 | 8.80 | 553.1575 | 553.1563 | 2.17   | C <sub>25</sub> H <sub>30</sub> O <sub>14</sub> | 2 | Lippioside II             | 161/135         | 131751542                     |
| 23 | 8.96 | 353.1822 | 353.1817 | 1.42   | C <sub>15</sub> H <sub>30</sub> O <sub>9</sub>  | 3 | Hydroxy-PEG6-acid         | -               | Pubchem:<br>60146229          |
| 24 | 9.28 | 653.2077 | 653.2087 | -1.53  | C <sub>30</sub> H <sub>38</sub> O <sub>16</sub> | 2 | Campneoside I             | 621             | (Quirantes-Piné et al., 2009) |
| 25 | 9.33 | 623.2    | 623.1981 | 3.05   | C <sub>29</sub> H <sub>36</sub> O <sub>15</sub> | 1 | Verbascoside isomer 1     | 153/161/179/487 | HMDB0034843                   |
| 26 | 9.40 | 623.1913 | 623.1981 | -10.91 | C <sub>29</sub> H <sub>36</sub> O <sub>15</sub> | 1 | Verbascoside isomer 2     | 153/161/179/487 | HMDB0034843                   |
| 27 | 9.56 | 623.1921 | 623.1981 | -9.63  | C <sub>29</sub> H <sub>36</sub> O <sub>15</sub> | 1 | Verbascoside isomer 3     | 153/161/179/487 | HMDB0034843                   |
| 28 | 9.64 | 417.2128 | 417.213  | -0.48  | C <sub>20</sub> H <sub>34</sub> O <sub>9</sub>  | 3 | Maryal                    | -               | Pubchem:<br>5320270           |
| 29 | 9.67 | 651.1231 | -        | -      | -                                               | 4 | Unknown                   | -               | -                             |
| 30 | 9.82 | 623.2007 | 623.1981 | 4.17   | C <sub>29</sub> H <sub>36</sub> O <sub>15</sub> | 1 | Verbascoside isomer 3     | 153/161/179/487 | HMDB0034843                   |

|    |       |          |          |        |                                                 |   |                                                         |             |                              |
|----|-------|----------|----------|--------|-------------------------------------------------|---|---------------------------------------------------------|-------------|------------------------------|
| 31 | 9.96  | 637.2131 | 637.2138 | -1.10  | C <sub>30</sub> H <sub>38</sub> O <sub>15</sub> | 3 | Verbaspinoside isomer 1                                 | -           | Pubchem:<br>23928137         |
| 32 | 10.02 | 521.1645 | 521.1665 | -3.84  | C <sub>25</sub> H <sub>30</sub> O <sub>12</sub> | 3 | Linearoside                                             | -           | Pubchem:<br>102066680        |
| 33 | 10.05 | 551.1693 | 551.1770 | -13.97 | C <sub>26</sub> H <sub>32</sub> O <sub>13</sub> | 2 | Durantoside I                                           | 175/151/235 | Pubchem:<br>95223135         |
| 34 | 10.11 | 463.2523 | 463.2549 | -5.61  | C <sub>22</sub> H <sub>40</sub> O <sub>10</sub> | 3 | Methyladuligose E                                       | -           | Pubchem:<br>101921401        |
| 35 | 10.34 | 467.2105 | 467.2075 | 6.42   | C <sub>27</sub> H <sub>32</sub> O <sub>7</sub>  | 3 | Mexicanolide                                            | -           | Pubchem: 267328              |
| 36 | 10.45 | 637.2162 | 637.2138 | 3.77   | C <sub>30</sub> H <sub>38</sub> O <sub>15</sub> | 3 | Verbaspinoside isomer 2                                 | -           | 23928137                     |
| 37 | 10.55 | 635.1270 | 635.1254 | 2.52   | C <sub>28</sub> H <sub>28</sub> O <sub>17</sub> | 3 | Acacetin 7-diglucuronide                                | -           | Pubchem:<br>11968442         |
| 38 | 10.62 | 651.2308 | 651.2294 | 2.15   | C <sub>31</sub> H <sub>40</sub> O <sub>15</sub> | 3 | Martynoside                                             | -           | HMDB0254342                  |
| 39 | 10.64 | 335.1708 | 335.1711 | -0.90  | C <sub>15</sub> H <sub>28</sub> O <sub>8</sub>  | 4 | Unknown                                                 | -           | -                            |
| 40 | 10.71 | 595.1654 | 595.1668 | -2.35  | C <sub>27</sub> H <sub>32</sub> O <sub>15</sub> | 2 | Neoeriocitrin                                           | 163/87      | Pubchem: 114627              |
| 41 | 10.94 | 591.2074 | 591.2083 | -1.52  | C <sub>29</sub> H <sub>36</sub> O <sub>13</sub> | 2 | Osmanthuside B                                          | 161/113     | (Leyva-Jiménez et al., 2018) |
| 42 | 11.04 | 569.2231 | 569.2240 | -1.58  | C <sub>27</sub> H <sub>38</sub> O <sub>13</sub> | 2 | Sesinoside                                              | 161/188/359 | Pubchem:<br>102502279        |
| 43 | 11.09 | 337.1870 | 337.1868 | 0.59   | C <sub>15</sub> H <sub>30</sub> O <sub>8</sub>  | 4 | Unknown                                                 | -           | -                            |
| 44 | 11.28 | 681.2200 | 681.2189 | 1.61   | C <sub>35</sub> H <sub>38</sub> O <sub>14</sub> | 2 | PinoresinolO-[6-O-(E)-caffeoyl]-<br>β-D-glucopyranoside | 323/161     | Pubchem: 17410               |
| 45 | 11.37 | 361.1878 | 361.1868 | 2.77   | C <sub>17</sub> H <sub>30</sub> O <sub>8</sub>  | 3 | Glyceryl octyl ascorbic acid                            | -           | Pubchem:<br>54588053         |
| 46 | 11.40 | 895.3534 | -        | -      | -                                               | 4 | Unknown                                                 | -           | -                            |



|    |       |          |          |       |                                                 |   |                                         |                     |                  |
|----|-------|----------|----------|-------|-------------------------------------------------|---|-----------------------------------------|---------------------|------------------|
| 47 | 11.48 | 181.0875 | 181.0870 | 2.76  | C <sub>10</sub> H <sub>14</sub> O <sub>3</sub>  | 3 | 3,4-Dimethoxyphenethyl alcohol          | -                   | Pubchem: 81911   |
| 48 | 11.67 | 579.1697 | 579.1719 | -3.80 | C <sub>27</sub> H <sub>32</sub> O <sub>14</sub> | 2 | Naringin                                | 163/137             | HMDB0002927      |
| 49 | 11.99 | 315.0493 | 315.0510 | -5.40 | C <sub>16</sub> H <sub>12</sub> O <sub>7</sub>  | 2 | Isorhamnetin isomer 1                   | 271/300             | HMDB0002655      |
| 50 | 12.29 | 481.1147 | 481.1140 | 1.45  | C <sub>25</sub> H <sub>22</sub> O <sub>10</sub> | 1 | Silybin isomer 1                        | 125/152/179/180/301 | MoNA:FIO01021    |
| 51 | 12.34 | 481.1124 | 481.1140 | -3.33 | C <sub>25</sub> H <sub>22</sub> O <sub>11</sub> | 1 | Silybin isomer 2                        | 125/152/179/180/302 | MoNA:FIO01022    |
| 52 | 12.44 | 481.1131 | 481.1140 | -1.87 | C <sub>25</sub> H <sub>22</sub> O <sub>12</sub> | 1 | Silybin isomer 3                        | 125/152/179/180/303 | MoNA:FIO01023    |
| 53 | 12.64 | 329.0647 | 329.0667 | -6.08 | C <sub>17</sub> H <sub>14</sub> O <sub>7</sub>  | 2 | 3,7-Dimethylquercetin isomer 1          | 285/299/314         | HMDB0029263      |
| 54 | 12.79 | 599.2689 | 599.2709 | -3.34 | C <sub>29</sub> H <sub>44</sub> O <sub>13</sub> | 2 | Jatamanvaltrate C                       | 162/243/291/389     | -                |
| 55 | 12.96 | 329.0668 | 329.0667 | 0.30  | C <sub>17</sub> H <sub>14</sub> O <sub>7</sub>  | 2 | 3,7-Dimethylquercetin isomer 2          | 285/299/314         | HMDB0029263      |
| 56 | 13.03 | 299.0546 | 299.0561 | -5.02 | C <sub>16</sub> H <sub>12</sub> O <sub>6</sub>  | 2 | Chrysoeriol                             | 183                 | HMDB0030667      |
| 57 | 13.14 | 394.2954 | -        | -     | -                                               | 4 | Unknown                                 | -                   | -                |
| 58 | 13.22 | 309.2061 | 309.2071 | -3.23 | C <sub>18</sub> H <sub>30</sub> O <sub>4</sub>  | 3 | 13(S)-Hydroperoxylinoleic acid isomer 1 | -                   | HMDB0003871      |
| 59 | 13.26 | 315.0502 | 315.0510 | -2.54 | C <sub>16</sub> H <sub>12</sub> O <sub>7</sub>  | 2 | Isorhamnetin isomer 2                   | 271/300             | HMDB0002655      |
| 60 | 13.28 | 309.2058 | 309.2071 | -4.20 | C <sub>18</sub> H <sub>30</sub> O <sub>4</sub>  | 3 | 13(S)-Hydroperoxylinoleic acid isomer 2 | -                   | HMDB0003871      |
| 61 | 13.39 | 297.1698 | 297.1707 | -3.03 | C <sub>16</sub> H <sub>26</sub> O <sub>5</sub>  | 3 | Dihydroartemisinin methyl ether         | -                   | Pubchem: 68911   |
| 62 | 13.53 | 307.1917 | 307.1915 | 0.65  | C <sub>18</sub> H <sub>28</sub> O <sub>4</sub>  | 2 | Dihydrocapsiate                         | 235/185/121         | HMDB0034781      |
| 63 | 13.61 | 343.0813 | 343.0823 | -2.91 | C <sub>18</sub> H <sub>16</sub> O <sub>7</sub>  | 2 | Quercetin 3',4',7-trimethyl ether       | 313/163             | Pubchem: 5748558 |
| 64 | 13.70 | 313.0697 | 313.0717 | -6.39 | C <sub>17</sub> H <sub>14</sub> O <sub>6</sub>  | 2 | Cirsimaritin isomer 1                   | 313                 | HMDB0250276      |

|    |       |          |          |       |                                                 |   |                                           |             |                       |
|----|-------|----------|----------|-------|-------------------------------------------------|---|-------------------------------------------|-------------|-----------------------|
| 65 | 13.78 | 373.0924 | 373.0929 | -1.34 | C <sub>19</sub> H <sub>18</sub> O <sub>8</sub>  | 2 | Chrysosplenetin                           | 315/256     | Pubchem:<br>5281608   |
| 66 | 13.92 | 293.1747 | 293.1758 | -3.75 | C <sub>17</sub> H <sub>26</sub> O <sub>4</sub>  | 3 | Gingerol                                  | -           | HMDB0005783           |
| 67 | 14.03 | 305.1731 | 305.1758 | -8.85 | C <sub>18</sub> H <sub>26</sub> O <sub>4</sub>  | 2 | 9,16-Dioxo-10,12,14-octadecatrienoic acid | 135/206/249 | Pubchem:<br>18546963  |
| 68 | 14.49 | 313.0697 | 313.0717 | -6.39 | C <sub>17</sub> H <sub>14</sub> O <sub>6</sub>  | 2 | Cirsimaritin isomer 2                     | 313         | HMDB0250276           |
| 69 | 14.84 | 413.2567 | 413.2545 | 5.32  | C <sub>22</sub> H <sub>38</sub> O <sub>7</sub>  | 3 | Ascorbyl palmitate isomer 1               | -           | HMDB0039883           |
| 70 | 14.90 | 413.2524 | 413.2545 | -5.08 | C <sub>22</sub> H <sub>38</sub> O <sub>7</sub>  | 3 | Ascorbyl palmitate isomer 2               | -           | HMDB0039883           |
| 71 | 14.99 | 721.3661 | 721.3652 | 1.25  | C <sub>34</sub> H <sub>58</sub> O <sub>16</sub> | 4 | Unknown                                   | -           | -                     |
| 72 | 15.74 | 293.2107 | 293.2122 | -5.12 | C <sub>18</sub> H <sub>30</sub> O <sub>3</sub>  | 3 | Hydroxylinolenic acid isomer 1            | -           | HMDB0011108           |
| 73 | 15.80 | 293.2119 | 293.2122 | -1.02 | C <sub>18</sub> H <sub>30</sub> O <sub>3</sub>  | 3 | Hydroxylinolenic acid isomer 2            | -           | HMDB0011108           |
| 74 | 15.85 | 293.2113 | 293.2122 | -3.07 | C <sub>18</sub> H <sub>30</sub> O <sub>3</sub>  | 3 | Hydroxylinolenic acid isomer 3            | -           | HMDB0011108           |
| 75 | 16.05 | 699.3800 | 699.3809 | -1.29 | C <sub>32</sub> H <sub>60</sub> O <sub>16</sub> | 3 | Propargyl-PEG14-acid                      | -           | Pubchem:<br>102514849 |
| 76 | 16.30 | 540.3306 | -        | -     | -                                               | 4 | Unknown                                   | -           | -                     |
| 77 | 16.42 | 295.2282 | 295.2279 | 1.02  | C <sub>18</sub> H <sub>32</sub> O <sub>3</sub>  | 3 | Hydroxylinoleic acid                      | -           | HMDB0247599           |
| 78 | 16.60 | 566.3530 | 566.3460 | 12.36 | C <sub>31</sub> H <sub>51</sub> O <sub>9</sub>  | 4 | Unknown                                   | -           | -                     |
| 79 | 16.68 | 293.2109 | 293.2122 | -4.43 | C <sub>18</sub> H <sub>30</sub> O <sub>3</sub>  | 3 | Hydroxylinolenic acid isomer 4            | -           | HMDB0011108           |
| 80 | 16.77 | 293.2120 | 293.2122 | -0.68 | C <sub>18</sub> H <sub>30</sub> O <sub>3</sub>  | 3 | Hydroxylinolenic acid isomer 4            | -           | HMDB0011108           |
| 81 | 18.46 | 277.2159 | 277.2173 | -5.05 | C <sub>18</sub> H <sub>30</sub> O <sub>2</sub>  | 2 | Linolenic acid                            | 205/97      | HMDB0001388           |
| 82 | 18.73 | 375.2712 | 375.2693 | 5.06  | C <sub>27</sub> H <sub>36</sub> O               | 2 | 10'-Apo-beta-carotenal                    | 116         | HMDB0059605           |
| 83 | 19.16 | 279.2328 | 279.2330 | -0.72 | C <sub>18</sub> H <sub>32</sub> O <sub>2</sub>  | 3 | Linoleic acid                             | -           | HMDB0000673           |

|    |       |          |          |       |                                                |   |                 |         |                 |
|----|-------|----------|----------|-------|------------------------------------------------|---|-----------------|---------|-----------------|
| 84 | 19.82 | 255.2325 | 255.2330 | -1.96 | C <sub>16</sub> H <sub>32</sub> O <sub>2</sub> | 2 | Palmitic acid   | 190/110 | HMDB0000220     |
| 85 | 19.95 | 281.2482 | 281.2486 | -1.42 | C <sub>18</sub> H <sub>34</sub> O <sub>2</sub> | 2 | Oleic Acid      | 211/101 | HMDB0000207     |
| 86 | 20.98 | 621.4417 | 621.4372 | 7.24  | C <sub>36</sub> H <sub>62</sub> O <sub>8</sub> | 3 | Ginsenoside Rh2 | -       | Pubchem: 119307 |

RT: Retention Time; Mol. Formula: Molecular Formula

**Table S5.** Identification of phytochemical compounds in *O. europaea* extract by HPLC-ESI-qTOF-MS.

| Peak | RT (min) | Observed [M-H]- | Theoretical [M-H]- | Mass error (ppm) | Mol. Formula                                    | Level of annotation | Compounds                                                                                                                     | MS/MS fragments | References                 |
|------|----------|-----------------|--------------------|------------------|-------------------------------------------------|---------------------|-------------------------------------------------------------------------------------------------------------------------------|-----------------|----------------------------|
| 1    | 0.94     | 194.0424        | 194.0426           | -1.03            | C <sub>6</sub> H <sub>10</sub> O <sub>7</sub>   | 3                   | Glucuronic acid                                                                                                               | -               | HMDB0000127                |
| 2    | 0.96     | 181.0721        | 181.0718           | 1.66             | C <sub>6</sub> H <sub>14</sub> O <sub>6</sub>   | 2                   | Sorbitol                                                                                                                      | 89/101          | HMDB0000247                |
| 3    | 1.02     | 195.0512        | 195.0510           | 1.03             | C <sub>6</sub> H <sub>12</sub> O <sub>7</sub>   | 2                   | Gluconic acid                                                                                                                 | 75/105/177      | HMDB0184581                |
| 4    | 1.05     | 383.1200        | 383.1195           | 1.31             | C <sub>14</sub> H <sub>24</sub> O <sub>12</sub> | 3                   | Acetylsaccharose                                                                                                              | -               | Pubchem: 129641662         |
| 5    | 1.13     | 133.0143        | 133.0142           | 0.75             | C <sub>4</sub> H <sub>6</sub> O <sub>5</sub>    | 3                   | Malic acid                                                                                                                    | -               | (Nergiz & Ergönül, 2009)   |
| 6    | 1.20     | 191.0545        | 191.0561           | -8.37            | C <sub>7</sub> H <sub>12</sub> O <sub>6</sub>   | 1                   | Quinic acid                                                                                                                   | 85/127          | HMDB03072                  |
| 7    | 1.27     | 317.0535        | -                  | -                | -                                               | 4                   | Unknown                                                                                                                       | -               | -                          |
| 8    | 1.72     | 96.9605         | 96.9601            | 4.13             | H <sub>2</sub> O <sub>4</sub> S                 | 3                   | Sulfate                                                                                                                       | -               | HMDB0001448                |
| 9    | 2.42     | 153.0551        | 153.0557           | -3.92            | C <sub>8</sub> H <sub>10</sub> O <sub>3</sub>   | 2                   | Hydroxytyrosol isomer 1                                                                                                       | 123/93          | HMDB0005784                |
| 10   | 2.69     | 153.0549        | 153.0557           | -5.23            | C <sub>8</sub> H <sub>10</sub> O <sub>3</sub>   | 2                   | Hydroxytyrosol isomer 2                                                                                                       | 123/93          | HMDB0005784                |
| 11   | 4.39     | 389.1113        | 389.1089           | 6.17             | C <sub>16</sub> H <sub>22</sub> O <sub>11</sub> | 2                   | Oleoside isomer 1                                                                                                             | 121/59/69       | (Fu et al., 2023)          |
| 12   | 4.91     | 389.1078        | 389.1089           | -2.83            | C <sub>16</sub> H <sub>22</sub> O <sub>11</sub> | 2                   | Oleoside isomer 2                                                                                                             | 121/59/69       | (Fu et al., 2023)          |
| 13   | 5.31     | 611.1881        | 611.1829           | 8.51             | C <sub>24</sub> H <sub>36</sub> O <sub>18</sub> | 3                   | 2-[2-hydroxy-3-[4-[2-hydroxy-3-(1,2,3-tricarboxypropan-2-yloxy)propoxy]cyclohexyl]oxypropoxy]propane-1,2,3-tricarboxylic acid | -               | Pubchem: 59999877          |
| 14   | 5.75     | 447.1487        | 447.1508           | -4.70            | C <sub>19</sub> H <sub>28</sub> O <sub>12</sub> | 2                   | Hydroxytyrosol derivative                                                                                                     | 285             | (Garcia-Aloy et al., 2020) |

|    |      |          |          |       |                                                   |   |                                                           |             |                               |
|----|------|----------|----------|-------|---------------------------------------------------|---|-----------------------------------------------------------|-------------|-------------------------------|
| 15 | 6.29 | 403.1208 | 403.1246 | -9.43 | C <sub>17</sub> H <sub>24</sub> O <sub>11</sub>   | 2 | Oleoside 11-methyl ester isomer 1                         | 165/223     | Pubchem: 10692563             |
| 16 | 7.01 | 377.1453 | 377.1453 | 0.00  | C <sub>16</sub> H <sub>26</sub> O <sub>10</sub>   | 2 | Aldehydic form of decarboxymethyl elenolic acid glucoside | 153/197     | (Garcia-Aloy et al., 2020)    |
| 17 | 7.48 | 519.1702 | 519.1719 | -3.27 | C <sub>22</sub> H <sub>32</sub> O <sub>14</sub>   | 3 | Segetoside A                                              | -           | Pubchem: 102316547            |
| 18 | 7.81 | 403.1239 | 403.1246 | -1.74 | C <sub>17</sub> H <sub>24</sub> O <sub>11</sub>   | 2 | Oleoside 11-methyl ester isomer 2                         | 165/223     | Pubchem: 10692563             |
| 19 | 7.91 | 461.1678 | 461.1664 | 3.04  | C <sub>20</sub> H <sub>30</sub> O <sub>12</sub>   | 2 | Verbascoside isomer 1                                     | 135/161/315 | (Quirantes-Piné et al., 2010) |
| 20 | 7.98 | 461.1657 | 461.1664 | -1.52 | C <sub>20</sub> H <sub>30</sub> O <sub>12</sub>   | 2 | Verbascoside isomer 1                                     | 135/161/315 | (Quirantes-Piné et al., 2010) |
| 21 | 8.05 | 555.1823 | 555.1719 | 18.73 | C <sub>25</sub> H <sub>32</sub> O <sub>14</sub>   | 2 | Hydroxyoleuropein isomer 1                                | 151         | (Katsinas et al., 2021)       |
| 22 | 8.18 | 593.1550 | 593.1512 | 6.41  | C <sub>27</sub> H <sub>30</sub> O <sub>15</sub>   | 2 | Vicenin 2                                                 | 353/383/473 | (Bouaziz et al., 2005)        |
| 23 | 8.42 | 401.1802 | 401.1817 | -3.74 | C <sub>19</sub> H <sub>30</sub> O <sub>9</sub>    | 2 | Methyl 7-epi-12-hydroxyjasmonate glucoside                | 221/59      | Pubchem: 131751189            |
| 24 | 8.51 | 581.2795 | 581.2815 | -3.44 | C <sub>26</sub> H <sub>46</sub> O <sub>14</sub>   | 4 | Unknown                                                   | -           | (Baker & Regg, 2018)          |
| 25 | 8.62 | 609.1487 | 609.1461 | 4.27  | C <sub>27</sub> H <sub>30</sub> O <sub>16</sub>   | 2 | Quercetin 3-O-rutinoside                                  | 271/300/301 | HMDB0257021                   |
| 26 | 8.72 | 195.0660 | 195.0663 | -1.54 | C <sub>10</sub> H <sub>12</sub> O <sub>4</sub>    | 2 | Hydroxytyrosol Acetate                                    | 59          | Pubchem: 155240               |
| 27 | 8.79 | 557.2455 | 557.2426 | 5.20  | C <sub>27</sub> H <sub>42</sub> O <sub>10</sub> S | 3 | Thiocladospolide J                                        | -           | (Salvatore et al., 2021)      |

|    |       |          |          |        |                                                 |   |                               |                     |                                 |
|----|-------|----------|----------|--------|-------------------------------------------------|---|-------------------------------|---------------------|---------------------------------|
| 28 | 8.96  | 555.1679 | 555.1719 | -7.20  | C <sub>25</sub> H <sub>32</sub> O <sub>14</sub> | 2 | Hydroxyoleuropein isomer 2    | 151                 | (Katsinas et al., 2021)         |
| 29 | 9.07  | 525.1620 | 525.1614 | 1.14   | C <sub>24</sub> H <sub>30</sub> O <sub>13</sub> | 2 | Demethyloleuropein            | 61/121/165          | Pubchem: 6450302                |
| 30 | 9.19  | 305.0662 | 305.0667 | -1.64  | C <sub>15</sub> H <sub>14</sub> O <sub>7</sub>  | 2 | Epigallocatechin              | 125                 | HMDB0038361                     |
| 31 | 9.37  | 623.1978 | 623.1981 | -0.48  | C <sub>29</sub> H <sub>36</sub> O <sub>15</sub> | 1 | Verbascoside isomer 1         | 161/315/461         | (Attia et al., 2018)            |
| 32 | 9.43  | 551.2700 | 551.2709 | -1.63  | C <sub>25</sub> H <sub>44</sub> O <sub>13</sub> | 3 | Norisoprenoid derivative      | -                   | (Cebrián-Tarancón et al., 2021) |
| 33 | 9.49  | 701.2317 | 701.2298 | 2.71   | C <sub>31</sub> H <sub>42</sub> O <sub>18</sub> | 2 | Oleuropein-glucoside isomer 1 | 139/357/481/566     | Pubchem: 102031346              |
| 34 | 9.55  | 701.2300 | 701.2298 | 0.29   | C <sub>31</sub> H <sub>42</sub> O <sub>18</sub> | 2 | Oleuropein-glucoside isomer 2 | 139/357/481/566     | Pubchem: 102031346              |
| 35 | 9.65  | 447.0934 | 447.0933 | 0.22   | C <sub>21</sub> H <sub>20</sub> O <sub>11</sub> | 3 | Luteolin 3'-glucoside         | -                   | Pubchem: 12309350               |
| 36 | 9.72  | 701.2291 | 701.2298 | -1.00  | C <sub>31</sub> H <sub>42</sub> O <sub>18</sub> | 2 | Oleuropein-glucoside isomer 3 | 139/357/481/566     | Pubchem: 102031346              |
| 37 | 9.81  | 623.1947 | 623.1981 | -5.46  | C <sub>29</sub> H <sub>36</sub> O <sub>15</sub> | 1 | Verbascoside isomer 2         | 161/315/461         | (Attia et al., 2018)            |
| 38 | 9.88  | 607.1936 | 607.2032 | -15.81 | C <sub>29</sub> H <sub>36</sub> O <sub>14</sub> | 3 | Isosyringalide 3'-rhamnoside  | -                   | Pubchem: 21629997               |
| 39 | 10.01 | 539.1779 | 539.1770 | 1.67   | C <sub>25</sub> H <sub>32</sub> O <sub>13</sub> | 1 | Oleuropein isomer 1           | 139/205/275/307/377 | HMDB0035872                     |
| 40 | 10.10 | 569.1834 | 569.1876 | -7.38  | C <sub>26</sub> H <sub>34</sub> O <sub>14</sub> | 2 | Methoxyoleuropein isomer 1    | 151                 | HMDB0035445                     |
| 41 | 10.13 | 569.1876 | 569.1876 | 0.00   | C <sub>26</sub> H <sub>34</sub> O <sub>14</sub> | 2 | Methoxyoleuropein isomer 2    | 151                 | HMDB0035445                     |
| 42 | 10.20 | 539.1808 | 539.1770 | 7.05   | C <sub>25</sub> H <sub>32</sub> O <sub>13</sub> | 1 | Oleuropein isomer 2           | 139/205/275/307/377 | HMDB0035872                     |
| 43 | 10.26 | 539.1811 | 539.1770 | 7.60   | C <sub>25</sub> H <sub>32</sub> O <sub>13</sub> | 1 | Oleuropein isomer 3           | 139/205/275/307/377 | HMDB0035872                     |

|    |       |          |          |        |                                                 |   |                                                |                     |                               |
|----|-------|----------|----------|--------|-------------------------------------------------|---|------------------------------------------------|---------------------|-------------------------------|
| 44 | 10.34 | 539.1736 | 539.1770 | -6.31  | C <sub>25</sub> H <sub>32</sub> O <sub>13</sub> | 1 | Oleuropein isomer 4                            | 139/205/275/307/377 | HMDB0035872                   |
| 45 | 10.46 | 539.1746 | 539.1770 | -4.45  | C <sub>25</sub> H <sub>32</sub> O <sub>13</sub> | 1 | Oleuropein isomer 5                            | 139/205/275/307/377 | HMDB0035872                   |
| 46 | 10.63 | 539.1781 | 539.1770 | 2.04   | C <sub>25</sub> H <sub>32</sub> O <sub>13</sub> | 1 | Oleuropein isomer 5                            | 139/205/275/307/377 | HMDB0035872                   |
| 47 | 10.71 | 601.2208 | 601.2138 | 11.64  | C <sub>27</sub> H <sub>38</sub> O <sub>15</sub> | 3 | Rubicauloside                                  | -                   | Pubchem: 196862               |
| 48 | 10.80 | 555.2057 | 555.2083 | -4.68  | C <sub>26</sub> H <sub>36</sub> O <sub>13</sub> | 3 | 11-Hydroxyiridodial glucoside pentaacetate     | 121/69/183          | CSID391583                    |
| 49 | 10.88 | 523.1812 | 523.1821 | -1.72  | C <sub>25</sub> H <sub>32</sub> O <sub>12</sub> | 2 | Ligstroside                                    | 361                 | HMDB0034751                   |
| 50 | 11.01 | 793.2908 | 793.2924 | -2.02  | C <sub>38</sub> H <sub>50</sub> O <sub>18</sub> | 4 | Unknown                                        | -                   | (Garcia-Aloy et al., 2020)    |
| 51 | 11.07 | 377.1218 | 377.1242 | -6.36  | C <sub>19</sub> H <sub>22</sub> O <sub>8</sub>  | 2 | Oleuropein aglycone isomer 1                   | 95/139              | HMDB0301749                   |
| 52 | 11.14 | 553.1924 | 553.1927 | -0.54  | C <sub>26</sub> H <sub>34</sub> O <sub>13</sub> | 3 | 4''-Methyloleuropein                           | -                   | C00056345                     |
| 53 | 11.20 | 377.1233 | 377.1242 | -2.39  | C <sub>19</sub> H <sub>22</sub> O <sub>8</sub>  | 2 | Oleuropein aglycone isomer 2                   | 95/139              | HMDB0301749                   |
| 54 | 11.28 | 377.1208 | 377.1242 | -9.02  | C <sub>19</sub> H <sub>22</sub> O <sub>8</sub>  | 2 | Oleuropein aglycone isomer 3                   | 95/139              | HMDB0301749                   |
| 55 | 11.34 | 393.1162 | 393.1191 | -7.38  | C <sub>19</sub> H <sub>22</sub> O <sub>9</sub>  | 2 | 10-hydroxyoleuropein aglycone isomer 1         | 137/181             | (Serrano-García et al., 2022) |
| 56 | 11.38 | 377.1223 | 377.1242 | -5.04  | C <sub>19</sub> H <sub>22</sub> O <sub>8</sub>  | 2 | Oleuropein aglycone isomer 4                   | 95/139              | HMDB0301749                   |
| 57 | 11.44 | 623.1403 | 623.1406 | -0.48  | C <sub>31</sub> H <sub>28</sub> O <sub>14</sub> | 3 | Isorhamnetin-3-O-β-D-(6-p-coumaroyl) glucoside | -                   | (Romero-Márquez et al., 2023) |
| 58 | 11.55 | 393.1150 | 393.1191 | -10.43 | C <sub>19</sub> H <sub>22</sub> O <sub>9</sub>  | 2 | 10-hydroxyoleuropein aglycone isomer 2         | 137/181             | (Serrano-García et al., 2022) |
| 59 | 12.15 | 377.1266 | 377.1242 | 6.36   | C <sub>19</sub> H <sub>22</sub> O <sub>8</sub>  | 2 | Oleuropein aglycone isomer 3                   | 95/139              | HMDB0301749                   |
| 60 | 12.38 | 377.1236 | 377.1242 | -1.59  | C <sub>19</sub> H <sub>22</sub> O <sub>8</sub>  | 2 | Oleuropein aglycone isomer 4                   | 95/139              | HMDB0301749                   |
| 61 | 12.54 | 377.1225 | 377.1242 | -4.51  | C <sub>19</sub> H <sub>22</sub> O <sub>8</sub>  | 2 | Oleuropein aglycone isomer 5                   | 95/139              | HMDB0301749                   |

|    |       |          |          |        |                                                 |   |                              |             |                                    |
|----|-------|----------|----------|--------|-------------------------------------------------|---|------------------------------|-------------|------------------------------------|
| 62 | 12.58 | 377.1231 | 377.1242 | -2.92  | C <sub>19</sub> H <sub>22</sub> O <sub>8</sub>  | 2 | Oleuropein aglycone isomer 6 | 95/139      | HMDB0301749                        |
| 63 | 12.59 | 287.2218 | 287.2228 | -3.48  | C <sub>16</sub> H <sub>32</sub> O <sub>4</sub>  | 2 | Dihydroxyhexadecanoic acid   | 99/134      | HMDB0037798                        |
| 64 | 12.95 | 315.0487 | 315.0510 | -7.30  | C <sub>16</sub> H <sub>12</sub> O <sub>7</sub>  | 3 | Isorhamnetin isomer 1        | -           | Pubchem:<br>5281691                |
| 65 | 13.06 | 315.0492 | 315.0510 | -5.71  | C <sub>16</sub> H <sub>12</sub> O <sub>7</sub>  | 3 | Isorhamnetin isomer 2        | -           | Pubchem:<br>5281691                |
| 66 | 13.41 | 377.1241 | 377.1242 | -0.27  | C <sub>19</sub> H <sub>22</sub> O <sub>8</sub>  | 2 | Oleuropein aglycone isomer 7 | 95/139      | HMDB0301749                        |
| 67 | 13.47 | 391.1384 | 391.1398 | -3.58  | C <sub>20</sub> H <sub>24</sub> O <sub>8</sub>  | 2 | Methyl-oleuropein aglycone   | 179/211/151 | (Garcia-Aloy et al.,<br>2020)      |
| 68 | 13.53 | 899.2973 | 899.2979 | -0.67  | C <sub>44</sub> H <sub>52</sub> O <sub>20</sub> | 4 | Unknown                      | -           | -                                  |
| 69 | 13.58 | 307.1926 | 307.1915 | 3.58   | C <sub>18</sub> H <sub>28</sub> O <sub>4</sub>  | 2 | Dihydrocapsiate              | 235/185     | Pubchem:<br>9873754                |
| 70 | 13.61 | 513.1774 | 513.1766 | 1.56   | C <sub>27</sub> H <sub>30</sub> O <sub>10</sub> | 2 | Baohuoside I                 | 173/217/366 | HMDB0248860                        |
| 71 | 13.71 | 659.2274 | 659.2345 | -10.77 | C <sub>33</sub> H <sub>40</sub> O <sub>14</sub> | 2 | 2''-O-Rhamnosylcariside II   | 366         | Pubchem:<br>5318987                |
| 72 | 13.92 | 293.1754 | 293.1758 | -1.36  | C <sub>17</sub> H <sub>26</sub> O <sub>4</sub>  | 3 | Phytuberin                   | -           | (Sánchez-Martínez<br>et al., 2022) |
| 73 | 14.03 | 305.1746 | 305.1758 | -3.93  | C <sub>18</sub> H <sub>26</sub> O <sub>4</sub>  | 3 | Dioxooctadecatrienoic acid   | -           | Pubchem:<br>18546963               |
| 74 | 14.35 | 513.1798 | 513.1766 | 6.24   | C <sub>27</sub> H <sub>30</sub> O <sub>10</sub> | 3 | Icariin II                   | -           | Pubchem:<br>123134739              |
| 75 | 15.00 | 721.3721 | 721.3746 | -3.47  | C <sub>45</sub> H <sub>54</sub> O <sub>8</sub>  | 4 | Unknown                      | -           | -                                  |
| 76 | 15.21 | 485.3277 | 485.3272 | 1.03   | C <sub>30</sub> H <sub>46</sub> O <sub>5</sub>  | 2 | Quillaic acid                | 439/409     | Pubchem: 101810                    |



|    |       |          |          |       |                                                 |   |                                                                           |                 |                             |
|----|-------|----------|----------|-------|-------------------------------------------------|---|---------------------------------------------------------------------------|-----------------|-----------------------------|
| 77 | 15.46 | 647.3255 | 647.3226 | 4.48  | C <sub>38</sub> H <sub>48</sub> O <sub>9</sub>  | 3 | 8,8a-Dihydro-8-hydroxygambogenic acid                                     | -               | (Tao et al., 2009)          |
| 78 | 15.74 | 293.2135 | 293.2122 | 4.43  | C <sub>18</sub> H <sub>30</sub> O <sub>3</sub>  | 2 | Hydroxylinolenic acid isomer 1                                            | 275/235         | HMDB0011108                 |
| 79 | 15.80 | 293.2120 | 293.2122 | -0.68 | C <sub>18</sub> H <sub>30</sub> O <sub>3</sub>  | 2 | Hydroxylinolenic acid isomer 2                                            | 275/235         | HMDB0011108                 |
| 80 | 15.84 | 293.2115 | 293.2122 | -2.39 | C <sub>18</sub> H <sub>30</sub> O <sub>3</sub>  | 2 | Hydroxylinolenic acid isomer 3                                            | 275/235         | HMDB0011108                 |
| 81 | 16.03 | 487.2899 | 487.2913 | -2.87 | C <sub>25</sub> H <sub>44</sub> O <sub>9</sub>  | 3 | Lankolide                                                                 | -               | Pubchem:<br>11465948        |
| 82 | 16.30 | 540.3291 | -        | -     | -                                               | 4 | Unknown                                                                   | -               | -                           |
| 83 | 16.42 | 295.2278 | 295.2279 | -0.34 | C <sub>18</sub> H <sub>32</sub> O <sub>3</sub>  | 3 | Hydroxylinoleic acid                                                      | -               | HMDB0247599                 |
| 84 | 16.60 | 566.3530 | 566.3460 | 12.36 | C <sub>31</sub> H <sub>51</sub> O <sub>9</sub>  | 4 | Unknown                                                                   | -               | -                           |
| 85 | 16.97 | 469.3303 | 469.3323 | -4.26 | C <sub>30</sub> H <sub>46</sub> O <sub>4</sub>  | 3 | Glycyrrhetic acid                                                         | -               | Pubchem: 73398              |
| 86 | 17.21 | 471.3464 | 471.3480 | -3.39 | C <sub>30</sub> H <sub>48</sub> O <sub>4</sub>  | 3 | Maslinic acid                                                             | -               | HMDB0002392                 |
| 87 | 17.55 | 799.3973 | 799.3910 | 7.88  | C <sub>43</sub> H <sub>60</sub> O <sub>14</sub> | 2 | Oleuropein derivative<br>(oleuropein + C <sub>18</sub> H <sub>28</sub> O) | 539/277/307/377 | (Contreras et al.,<br>2021) |
| 88 | 18.46 | 277.2167 | 277.2173 | -2.16 | C <sub>18</sub> H <sub>30</sub> O <sub>2</sub>  | 3 | Linolenic acid                                                            | -               | HMDB0001388                 |
| 89 | 18.58 | 777.4053 | 777.4067 | -1.80 | C <sub>41</sub> H <sub>62</sub> O <sub>14</sub> | 2 | Oleuropein derivative<br>(oleuropein + C <sub>16</sub> H <sub>30</sub> O) | 539/275/307/377 | (Contreras et al.,<br>2021) |
| 90 | 18.73 | 375.2712 | 375.2693 | 5.06  | C <sub>27</sub> H <sub>36</sub> O               | 2 | 10'-Apo-beta-carotenal                                                    | 116             | HMDB0059605                 |
| 91 | 19.00 | 617.3837 | 617.3848 | -1.78 | C <sub>39</sub> H <sub>54</sub> O <sub>6</sub>  | 3 | 3-beta-O-(trans-p-Coumaroyl)maslinic acid                                 | -               | Pubchem:<br>14335962        |
| 92 | 19.16 | 279.2328 | 279.2330 | -0.72 | C <sub>18</sub> H <sub>32</sub> O <sub>2</sub>  | 3 | Linoleic acid                                                             | -               | HMDB0000673                 |
| 93 | 19.64 | 933.6920 | -        | -     | -                                               | 4 | Unknown                                                                   | -               | -                           |
| 94 | 19.82 | 255.2325 | 255.2330 | -1.96 | C <sub>16</sub> H <sub>32</sub> O <sub>2</sub>  | 2 | Palmitic acid                                                             | 190/110         | HMDB0000220                 |

|     |       |          |          |       |                                                 |   |                             |         |                      |
|-----|-------|----------|----------|-------|-------------------------------------------------|---|-----------------------------|---------|----------------------|
| 95  | 19.85 | 403.3052 | 403.3065 | -3.22 | C <sub>22</sub> H <sub>44</sub> O <sub>6</sub>  | 3 | Hexadecyl D-glucoside       | -       | Pubchem: 171356      |
| 96  | 19.95 | 281.2482 | 281.2486 | -1.42 | C <sub>18</sub> H <sub>34</sub> O <sub>2</sub>  | 2 | Oleic Acid                  | 211/101 | HMDB0000207          |
| 97  | 20.30 | 391.2838 | 391.2854 | -4.09 | C <sub>24</sub> H <sub>40</sub> O <sub>4</sub>  | 4 | Unknown                     | -       | -                    |
| 98  | 20.39 | 621.2719 | 621.2705 | 2.25  | C <sub>35</sub> H <sub>42</sub> O <sub>10</sub> | 3 | 1-Hydroxy taxuspine C       | -       | Pubchem:<br>15923424 |
| 99  | 20.97 | 383.1916 | 383.1923 | -1.83 | C <sub>16</sub> H <sub>32</sub> O <sub>10</sub> | 3 | Hexanedioic acid derivative | -       | Pubchem:<br>88032455 |
| 100 | 21.24 | 758.5444 | -        | -     | -                                               | 4 | Unknown                     | -       | -                    |

RT: Retention Time; Mol. Formula: Molecular Formula

**Table S6.** Numerical results (mean and SD) and statistics significance for Figure 1 results.

| Conc. (µg/mL) | Cell viability (%) |      |       |        |      |       |        |      |       |        |      |       |        |      |       |
|---------------|--------------------|------|-------|--------|------|-------|--------|------|-------|--------|------|-------|--------|------|-------|
|               | HS                 |      |       | LC     |      |       | OE     |      |       | SM     |      |       | TC     |      |       |
|               | Mean               | SD   | Sign. | Mean   | SD   | Sign. | Mean   | SD   | Sign. | Mean   | SD   | Sign. | Mean   | SD   | Sign. |
| 0             | 100.00             | 2.41 |       | 100.00 | 1.92 |       | 100.00 | 3.75 |       | 100.00 | 4.04 |       | 100.00 | 2.25 |       |
| 5             | 100.19             | 2.09 | ns    | 106.16 | 1.92 | ns    | 97.30  | 4.02 | ns    | 99.31  | 4.03 | ns    | 97.47  | 3.62 | ns    |
| 10            | 97.37              | 5.69 | ns    | 105.84 | 5.54 | ns    | 96.71  | 3.60 | ns    | 99.36  | 4.69 | ns    | 101.09 | 2.62 | ns    |
| 15            | 103.05             | 1.87 | ns    | 109.53 | 4.59 | ***   | 96.04  | 4.41 | ns    | 97.40  | 5.00 | ns    | 101.14 | 5.97 | ns    |
| 20            | 99.77              | 1.30 | ns    | 110.97 | 4.49 | ****  | 93.02  | 2.71 | ns    | 96.18  | 4.06 | ns    | 101.10 | 3.03 | ns    |
| 25            | 103.70             | 2.71 | ns    | 96.77  | 2.68 | ns    | 96.81  | 2.99 | ns    | 97.35  | 4.10 | ns    | 98.46  | 1.04 | ns    |
| 30            | 101.25             | 2.15 | ns    | 95.82  | 1.29 | ns    | 94.06  | 4.12 | ns    | 95.38  | 2.93 | ns    | 100.30 | 3.67 | ns    |
| 40            | 100.05             | 2.21 | ns    | 98.48  | 1.99 | ns    | 92.53  | 5.88 | ns    | 95.74  | 3.42 | ns    | 97.28  | 1.96 | ns    |
| 50            | 97.57              | 2.83 | ns    | 91.44  | 5.59 | ****  | 87.62  | 4.11 | ****  | 95.51  | 4.65 | ns    | 99.41  | 2.51 | ns    |
| 60            | 98.77              | 3.16 | ns    | 87.56  | 2.78 | ****  | 81.51  | 4.19 | ****  | 90.24  | 2.59 | **    | 98.03  | 2.30 | ns    |
| 80            | 98.32              | 4.63 | ns    | 69.95  | 1.77 | ****  | 71.72  | 7.37 | ****  | 91.84  | 5.65 | *     | 98.11  | 3.60 | ns    |
| 100           | 96.49              | 3.11 | ns    | 68.24  | 1.99 | ****  | 68.43  | 4.10 | ****  | 87.71  | 3.33 | ****  | 103.62 | 2.97 | ns    |
| 150           | 94.50              | 5.82 | ns    | 51.30  | 2.74 | ****  | 37.77  | 6.16 | ****  | 72.20  | 3.60 | ****  | 103.84 | 3.41 | ns    |
| 200           | 88.98              | 4.37 | ****  | 32.41  | 1.73 | ****  | 26.04  | 3.20 | ****  | 64.08  | 4.72 | ****  | 98.51  | 1.79 | ns    |
| 250           | 85.61              | 1.41 | ****  | 28.39  | 2.35 | ****  | 25.26  | 1.50 | ****  | 67.01  | 2.21 | ****  | 105.05 | 2.22 | ns    |
| 300           | 81.52              | 3.51 | ****  | 30.46  | 2.33 | ****  | 24.75  | 0.81 | ****  | 61.96  | 0.56 | ****  | 102.69 | 2.95 | ns    |
| 400           | 68.47              | 1.75 | ****  | 31.05  | 1.60 | ****  | 25.75  | 1.18 | ****  | 50.24  | 1.12 | ****  | 94.96  | 3.91 | ns    |
| 500           | 63.38              | 1.88 | ****  | 35.06  | 2.02 | ****  | 26.65  | 0.75 | ****  | 37.23  | 2.36 | ****  | 85.16  | 3.16 | ****  |
| 600           | 58.82              | 1.56 | ****  | 37.52  | 1.00 | ****  | 27.40  | 1.83 | ****  | 23.45  | 1.64 | ****  | 76.42  | 4.09 | ****  |

ns (non statistical significance), \* ( $p < 0.05$ ), \*\* ( $p < 0.01$ ), \*\*\* ( $p < 0.001$ ) and \*\*\*\* ( $p < 0.0001$ ).

**Table S7.** Equivalent DMSO concentrations for each extract concentration.

| Equivalent extract conc. (ug/mL) | DMSO (%) | Cell viability (%) |      |       |
|----------------------------------|----------|--------------------|------|-------|
|                                  |          | Mean               | SD   | Sign. |
| 0                                | 0        | 100.00             | 5.65 | ns    |
| 300                              | 0.3      | 99.37              | 2.17 | ns    |
| 400                              | 0.4      | 99.78              | 8.00 | ns    |
| 500                              | 0.5      | 97.62              | 3.66 | ns    |
| 600                              | 0.6      | 98.16              | 4.17 | ns    |
| 800                              | 0.8      | 91.22              | 3.69 | ****  |

*ns* (non statistical significance) and \*\*\*\* ( $p<0.0001$ ).
